# Supplementary material for: In situzinc cyanamide coordination induced highly N-rich graphene for efficient peroxymonosulfate activation
Source: Royal Society of Chemistry journal article supplement (doi:10.1039/d2ta00506a), 2022-01-01
Supplement: d2ta00506a1.pdf [file d2ta00506a1.pdf]

1 **Supporting information**

2

3 ***In-situ* zinc cyanamide coordination induced highly N-rich graphene**  
4 **for efficient peroxymonosulfate activation**

5

6 Junjie Zhang <sup>a</sup>, Hanwen Liu <sup>a</sup>, Wenran Gao <sup>b</sup>, Dongfang Cheng <sup>c</sup>, Fatang Tan <sup>a</sup>, Wei Wang <sup>a, \*</sup>,  
7 Xinyun Wang <sup>a</sup>, Xueliang Qiao <sup>a</sup>, Po Keung Wong <sup>d</sup>, Yonggang Yao <sup>a, \*</sup>

8

9 <sup>a</sup> State Key Laboratory of Materials Processing and Die & Mould Technology, School of  
10 Materials Science and Engineering, Huazhong University of Science and Technology, Wuhan  
11 430074, Hubei, China

12 <sup>b</sup> Joint International Research Laboratory of Biomass Energy and Materials, Co-Innovation  
13 Center of Efficient Processing and Utilization of Forest Resources, College of Materials  
14 Science and Engineering, Nanjing Forestry University, Nanjing 210037, China

15 <sup>c</sup> Department of Chemical and Biomolecular Engineering, University of California, Los  
16 Angeles, Los Angeles, California 90095, United States

17 <sup>d</sup> School of Life Sciences, The Chinese University of Hong Kong, Shatin, NT, Hong Kong  
18 SAR, China

19

20 \* Corresponding author. E-mail: weiwang@hust.edu.cn; yaoyg@hust.edu.cn

21

22

## 23 **S1 Experimental Section**

24 Materials and chemicals: Zinc (Zn) powder, melamine, dicyandiamide, thiourea,  
25 hydrochloric acid (HCl), *p*-benzoquinone and ethanol were supplied by Sinopharm Chemical  
26 Reagent Co., Ltd.. Tetracycline, cyanamide, furfuryl alcohol, potassium peroxymonosulfate  
27 (PMS, 98 wt%), 5,5-dimethyl-pyridine N-oxide (DMPO, 97 wt%) and 2,2,6,6-  
28 tetramethylpiperidine (TEMP, 99 wt%) were purchased from Aladdin (China) Reagent Co.,  
29 Ltd. All chemicals were of analytical grade and used as received without any purification in  
30 all experiments.

31 Preparation of porous ultrahigh nitrogen-doped graphene (NRG) samples: NRG samples  
32 were synthesized via the pyrolysis of different N-rich organics (melamine, dicyandiamide or  
33 thiourea) at the assistance of zinc catalyst. In a typical procedure, 4 g melamine and 2 g Zn  
34 were completely mixed by grinding in an agate mortar. The obtained mixture was added into  
35 a combustion boat and annealed at 900 °C in argon (Ar) atmosphere for 2 h with a ramp rate  
36 of 10 °C/min. To remove the catalyst, the pyrolysis product was leached overnight using an  
37 aqueous solution of 1 M HCl, washed with Milli-Q water several times, and then dried at 60  
38 °C in a vacuum oven. The catalysts prepared with melamine, dicyandiamide and thiourea  
39 were donated as NRG-ME, NRG-DI and NRG-TH, respectively. Taking ME as a  
40 representative N-rich organics, the effects of pyrolysis temperature (700, 800, 900 and 1000  
41 °C), mass ratio of melamine to Zn (1:1, 2:1, and 5:1) and ramp rate of pyrolysis (5, 10, 20 and  
42 30 °C/min) on NRG formation were investigated. If one parameter was regulated, the other  
43 parameters were identical to the as-prepared NRG-ME (2:1, 900 °C and 10 °C/min). The  
44 samples prepared at 700, 800, 900 and 1000 °C were donated as NRG-700, NRG-800, NRG-

45 900 (ME) and NRG-1000, respectively. The samples prepared with mass ratio of 1:1, 2:1 and  
46 5:1 were donated as NRG-1:1, NRG-2:1 (ME) and NRG-5:1, respectively. The samples  
47 prepared with the ramp rate of 5, 10, 20 and 30 °C/min donated as NRG-5, NRG-10 (ME),  
48 NRG-20 and NRG-30, respectively.

49 Preparation of ZnNCN: Pure ZnNCN was synthesized based on other report.<sup>1</sup>  
50 Specifically, 12.0 g ZnCl<sub>2</sub> was dissolved into 90 mL H<sub>2</sub>O under magnetic stirring.  
51 Subsequently, 12.5% ammonia solution was added dropwise into the above solution until the  
52 formation of white precipitate. Then, 25% ammonia solution was added to dissolve the  
53 precipitate. Followingly, 60 mL cyanamide solution (0.1 g/mL) was added into the above  
54 zinc-containing solution. After 3 h reaction, the white precipitate was filtered, washed with  
55 water and dried at 60 °C for 12 h to obtain ZnNCN.

56 Measurement and Instruments: The phase structures of all samples were investigated on  
57 a Philips/X' Pert PRO X-ray powder diffractometer (XRD) using CuK $\alpha$  radiation ( $\lambda=1.5418$   
58 Å). The surface functional groups were detected by Fourier transform infrared (FT-IR) spectra  
59 conducted on a Bruker VERTEX70 spectrometer with a KBr beam splitter. The Raman data  
60 were measured on a LabRAM HR800 Raman spectrometer using the excitation wavelength of  
61 532 nm. The morphologies of materials were characterized by a NanoSEM 450 scanning  
62 electron microscope (SEM) with accelerating voltage of 10 kV. The structural texture and  
63 element distribution were observed by a JEM-2100F field-emission transmission electron  
64 microscope (TEM) equipped with an energy-dispersive X-ray spectroscopy (EDX). The  
65 chemical information of materials was measured using X-ray photoelectron spectroscopy  
66 (XPS) conducted on a Kratos/Axis Ultra DLD-600 W spectrometer. Brunauer-Emmett-Teller

67 (BET) surface area of the obtained materials was collected by a Micro meritics ASAP 2020M  
68 surface area analyzer with nitrogen adsorption at -196 °C. The reactive oxidative species  
69 (ROs) were investigated by electron paramagnetic resonance (EPR) on a Bruker A300  
70 spectrometer using DMPO and TEMP as trapping agents.

71 Degradation performance of NRG samples: The catalytic degradation was carried out in  
72 a 250 mL beaker which contained 200 mL of 20 mg/L tetracycline solution and 4 mg of NRG.  
73 After adding 0.5 mL of fresh PMS (48 mg/mL) solution into the mixture, the degradation  
74 reaction was initiated. About 3 mL of mixture was taken out and filtered through a 0.22 μm  
75 pore-size syringe at different time intervals to detect the concentration of residual organics.  
76 The concentrations of tetracycline was analyzed by high performance liquid chromatography-  
77 mass spectrometry (HPLC, Agilent, 1260-Infinity) at a detection wavelength of 368 nm.<sup>2</sup>  
78 Selected quenching agents (EtOH, *p*BZQ and FFA) were used to identify the reactive  
79 oxidative species (ROS) generated in the reaction process. The degradation process was fitted  
80 by the first-order kinetic model, obeying the following formula (Eq.1):

$$81 \quad \ln\left(\frac{C}{C_0}\right) = -kt \quad (1)$$

82 Where  $C_0$  is the initial tetracycline concentration,  $C$  is the concentration at a certain time  $t$   
83 during the degradation, and  $k$  is the reaction rate constant.

84 Density functional theory (DFT) calculations: Adsorption of PMS on different N-doped  
85 graphene was calculated via DFT based on a  $C_{42}H_{16}$  model for pristine graphene. Vienna ab-  
86 initio simulation package (VASP) was used to carried out calculations with the perdw-burke-  
87 ernzerhof (PBE) exchange correlation functional.<sup>3</sup> DFT-D3 method was utilized to describe  
88 van der Waals interactions.<sup>4</sup> The cut off energy was 400 eV and the interactions between the

89 atomic cores and electrons were described by the projector augmented wave (PAW) method.<sup>5</sup>  
90 The sizes of unit cell for pyrrolic, pyridinic, and graphitic N-doped graphene were  $25 \times 25 \times 15$   
91 Å, and all these structures were optimized until the force on each atom was less than 0.02  
92 eV/Å. The Brillouin zone was only sampled by gamma point.  $(3 \times 3 \times 5)$  K-point was used to  
93 calculate the electronic structures.

94

95

96

97

98

99

100

101

102

103

104

105

106 **S2 Supporting Figures**

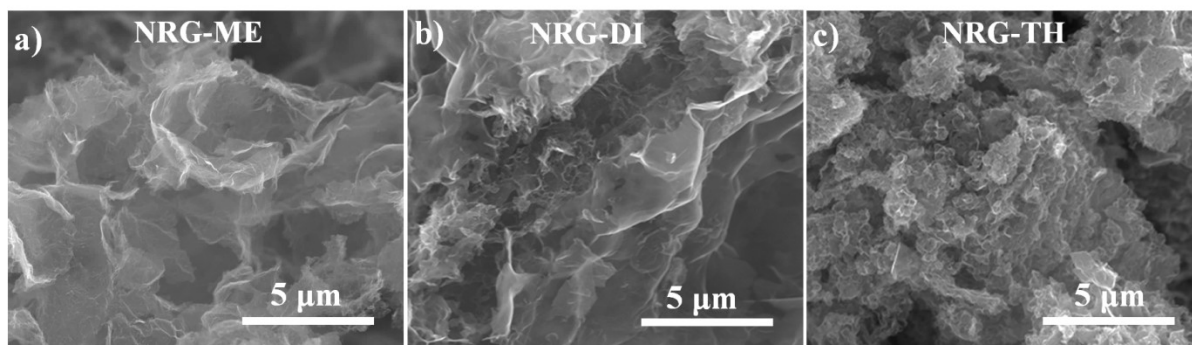

108 **Fig. S1.** SEM images of a) NRG-ME, b) NRG-DI and c) NRG-TH

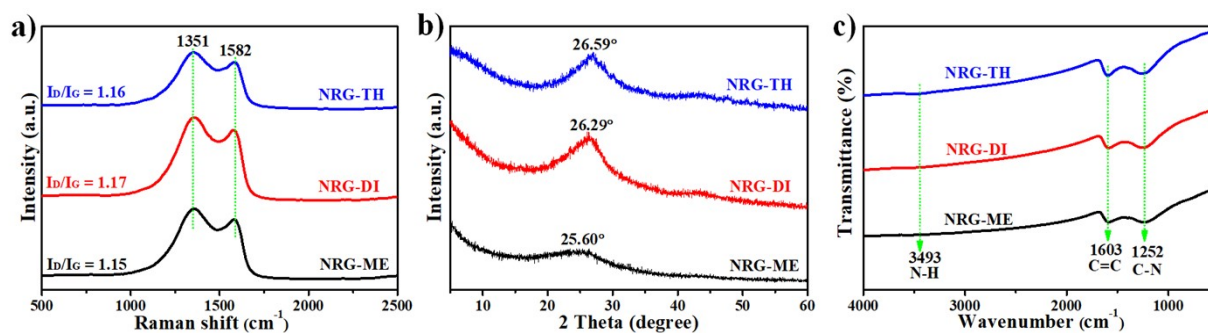

111 **Fig. S2.** a) Raman spectra, b) XRD patterns and c) FT-IR spectra of NRG samples.

112

113

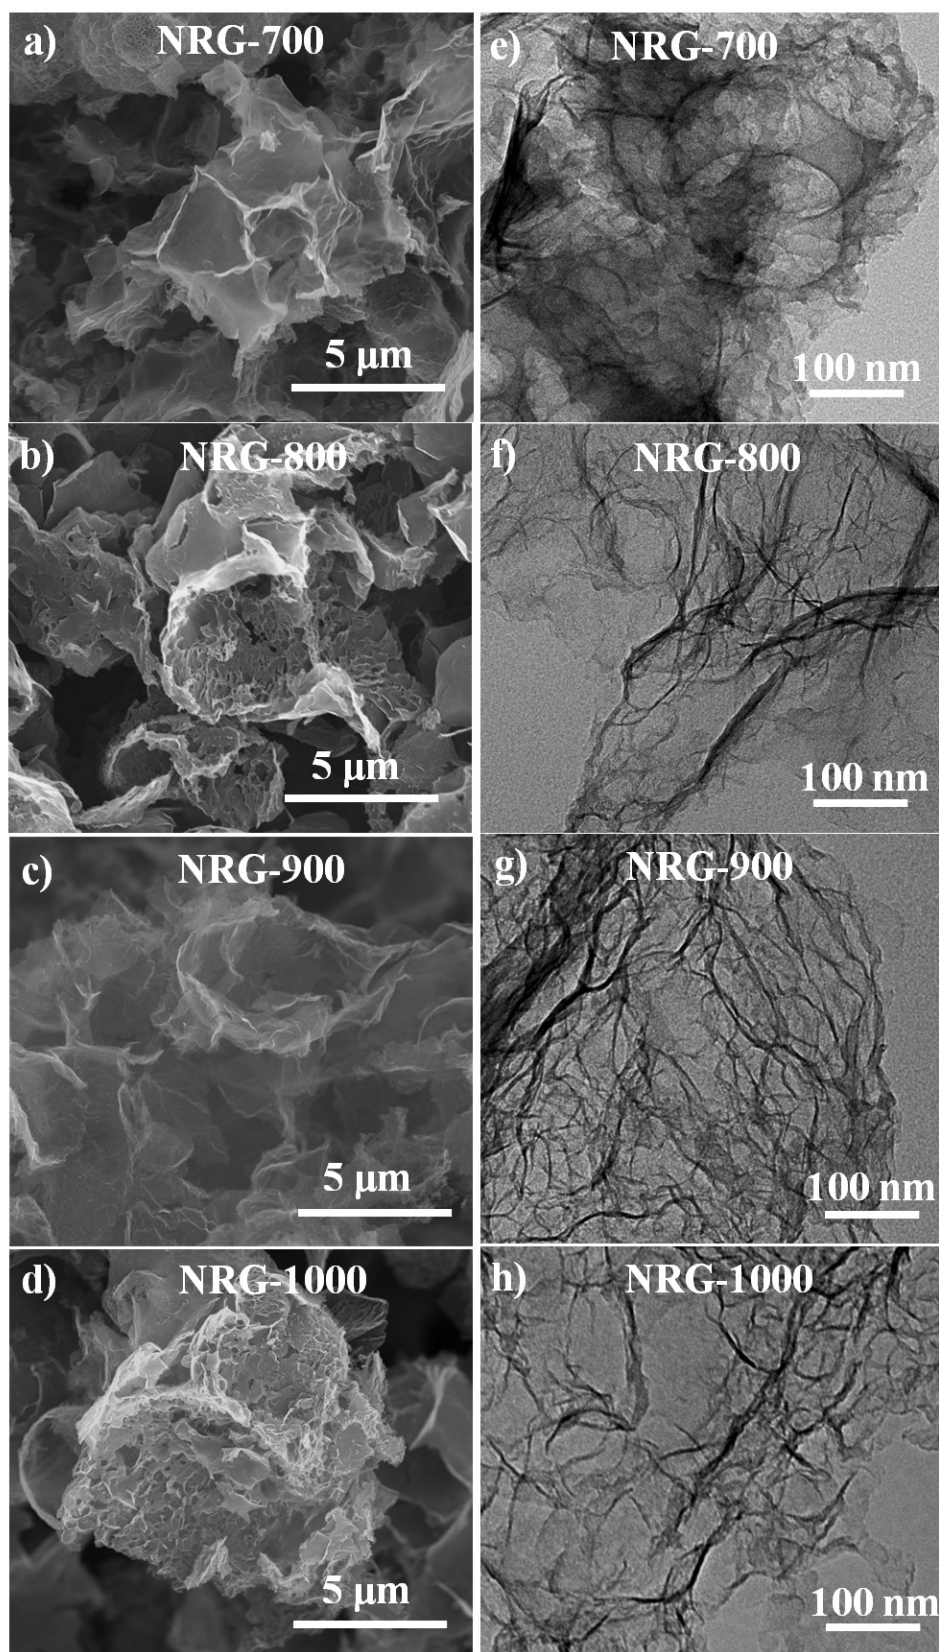

114

115 **Fig. S3.** a)-d) SEM images of NRG samples. e)-h) TEM images of NRG samples prepared at

116

different temperature.

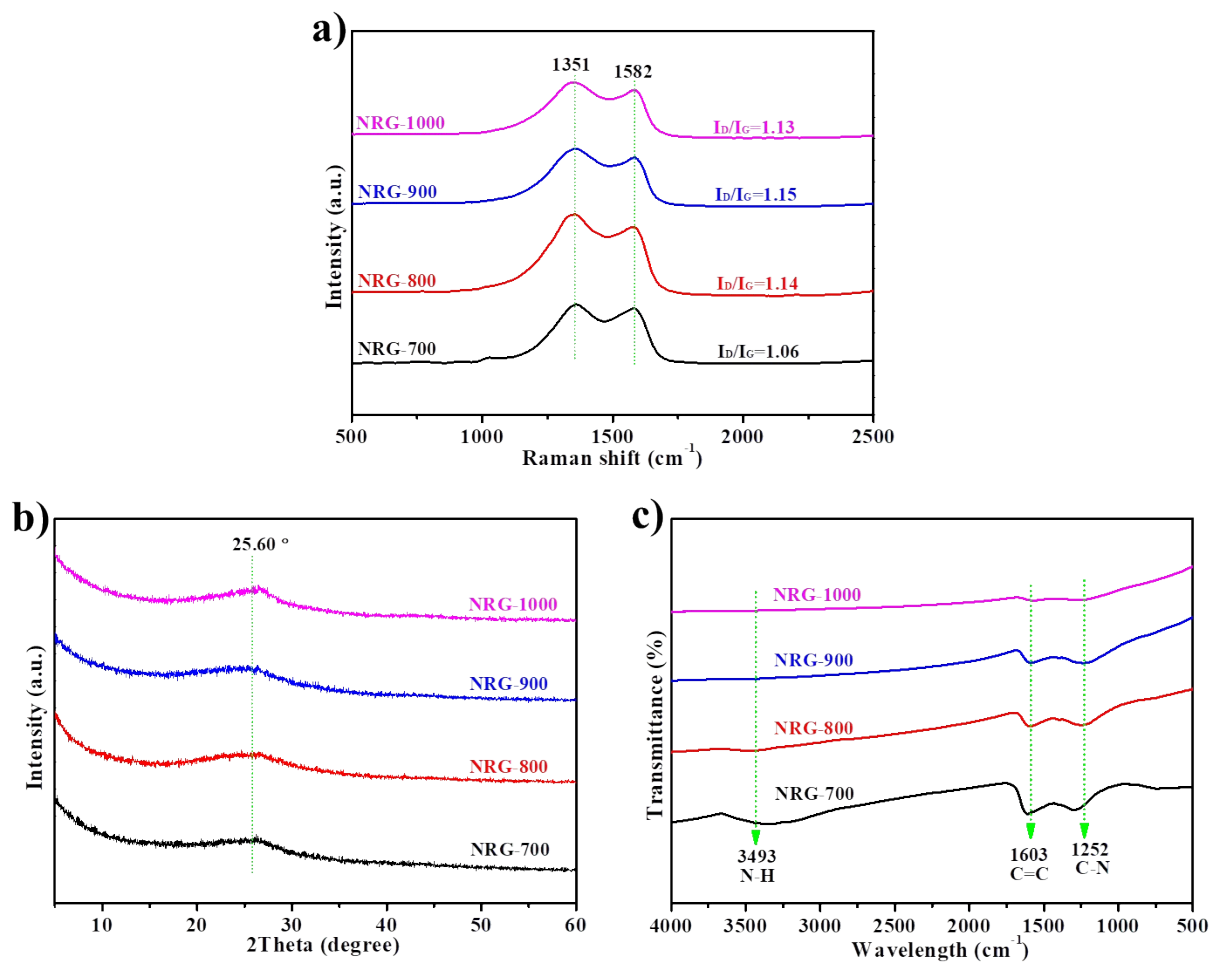

117

118 **Fig. S4.** a) Raman spectra, b) XRD patterns and c) FT-IR spectra of NRG samples prepared at

119

different temperature.

120

121

122

123

124



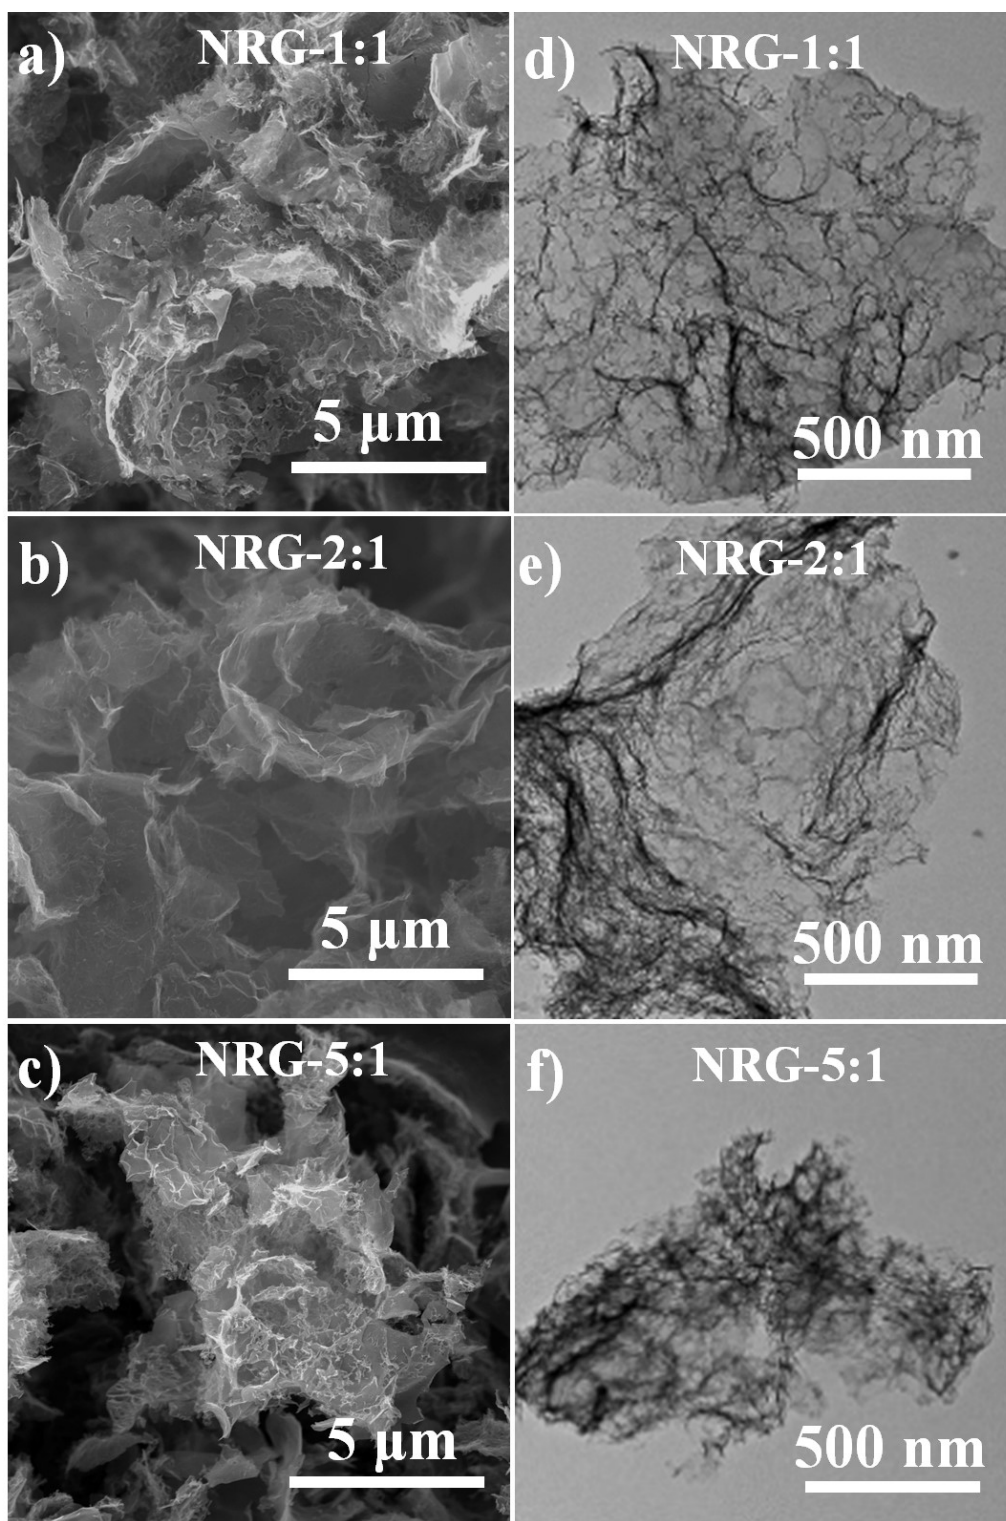

125

126

**Fig. S5.** a-c) SEM images and d-f) TEM images of the products obtained at different

127

melamine/Zn mass ratio.

128

129

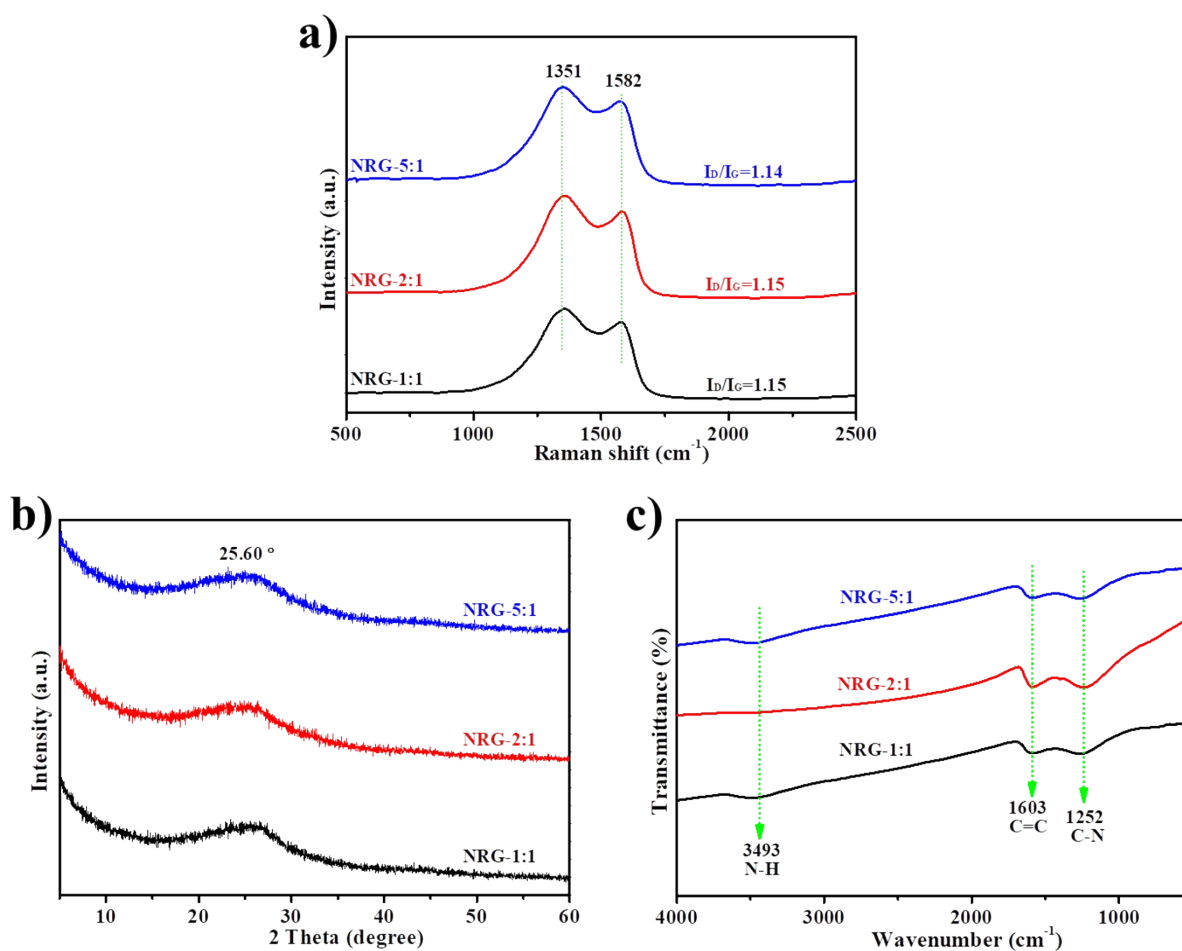

130

131 **Fig. S6.** a) Raman spectra, b) XRD patterns and c) FT-IR spectra of NRG samples prepared at

132

different melamine/Zn mass ratio.

133

134

135

136

137

138

139

140

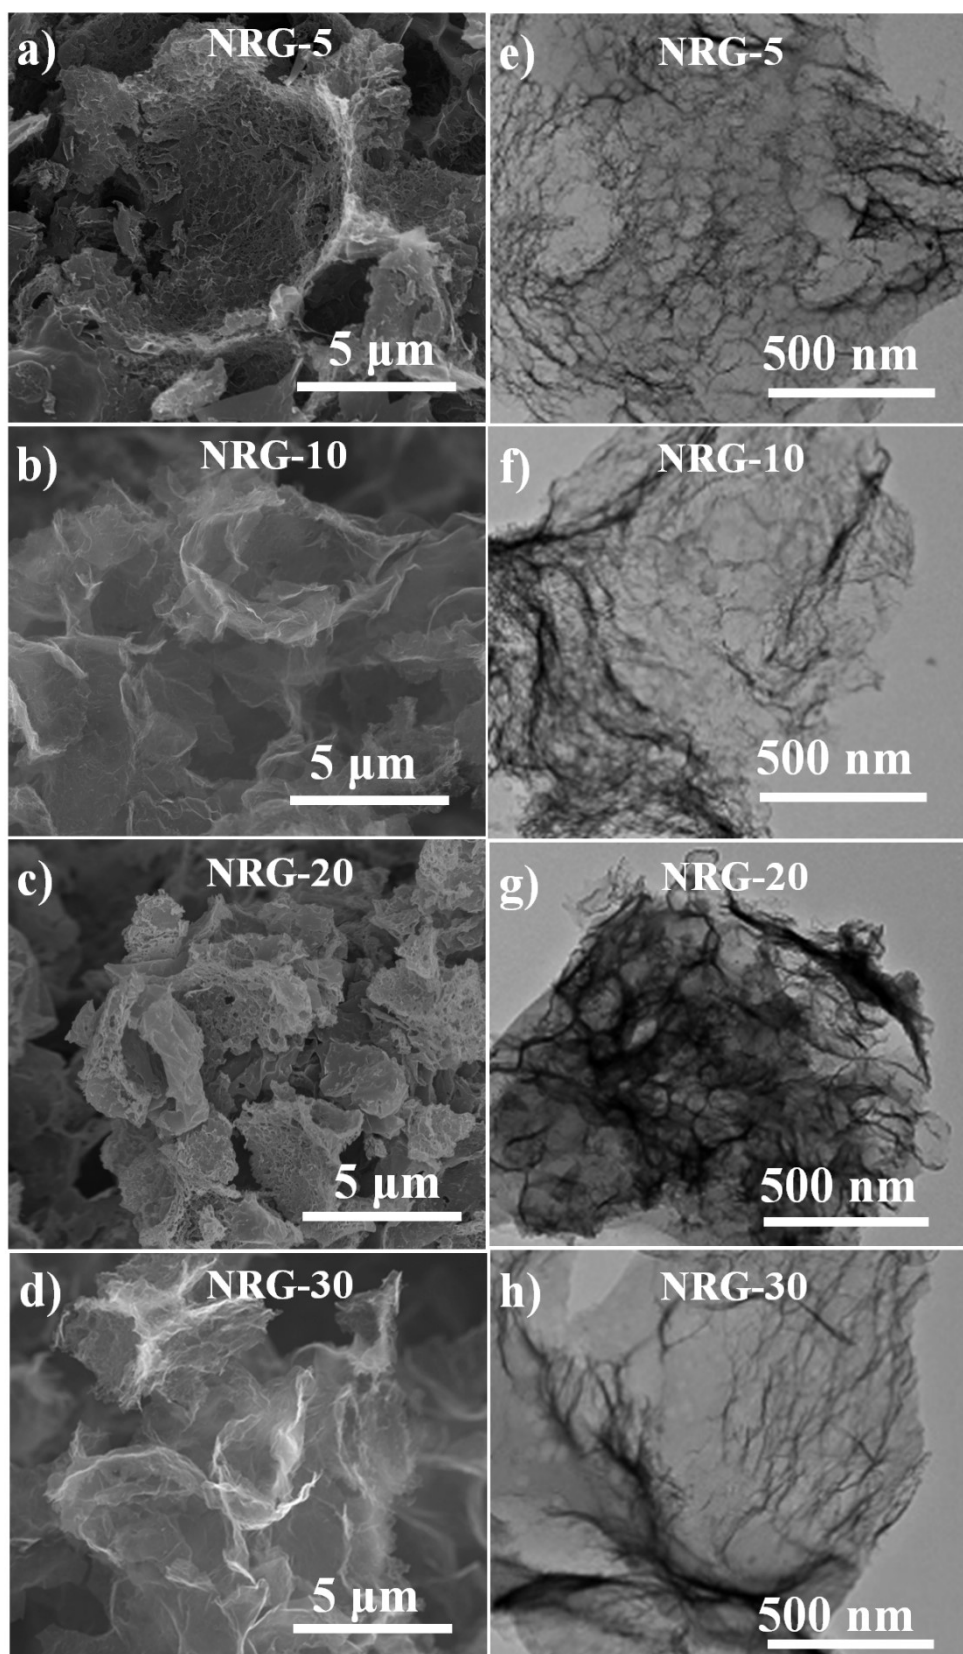

141

142 **Fig. S7.** a-d) SEM images and e-h) TEM images of the products obtained at different ramp

143

rate.

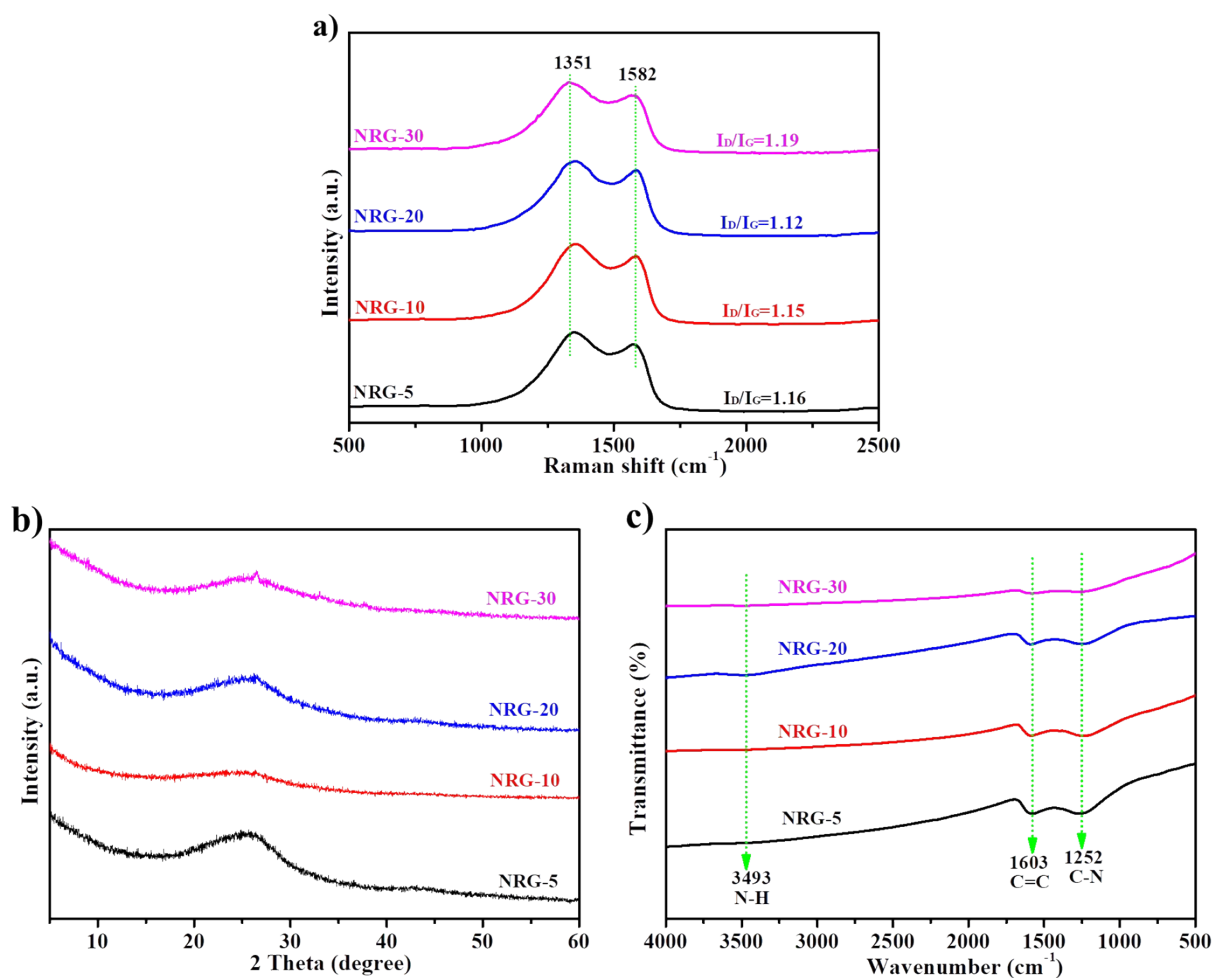

144

145 **Fig. S8.** a) Raman spectra, b) XRD patterns and c) FT-IR spectra of NRG samples prepared at

146

different ramp rate.

147

148

149

150

151

152

153

154

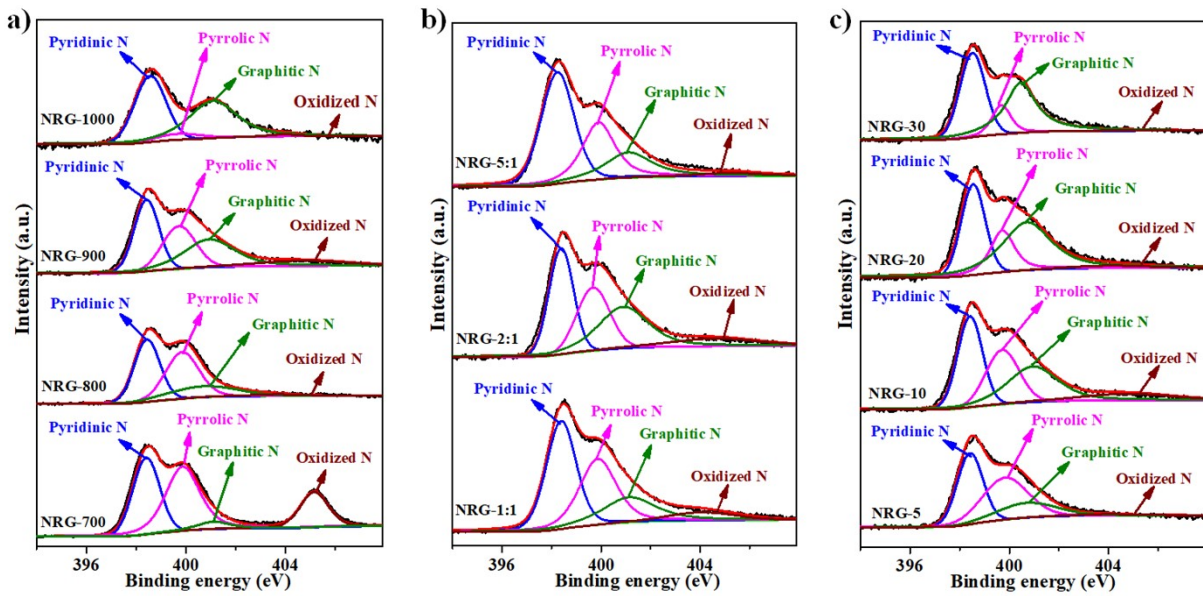

155

156 **Fig. S9.** High-resolution N 1s XPS spectra of NRG samples prepared at different conditions: a)

157

temperature, b) melamine/Zn mass ratio and c) ramp rate.

158

159

160

161

162

163

164

165

166

167

168

169

170

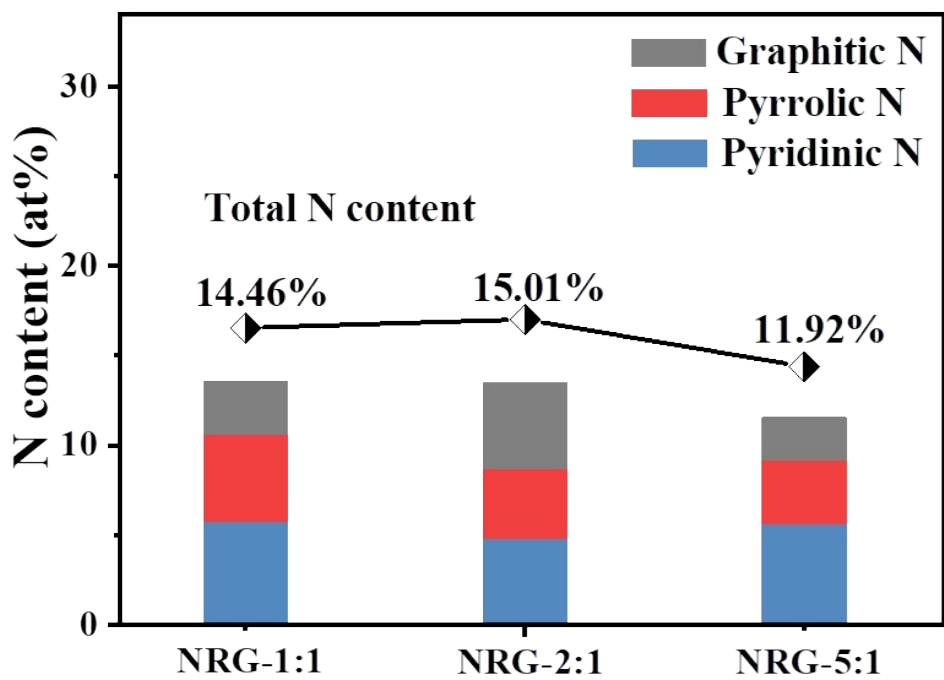

171

172

**Fig. S10.** N contents of NRG prepared at different melamine/Zn mass ratio.

173

174

175

176

177

178

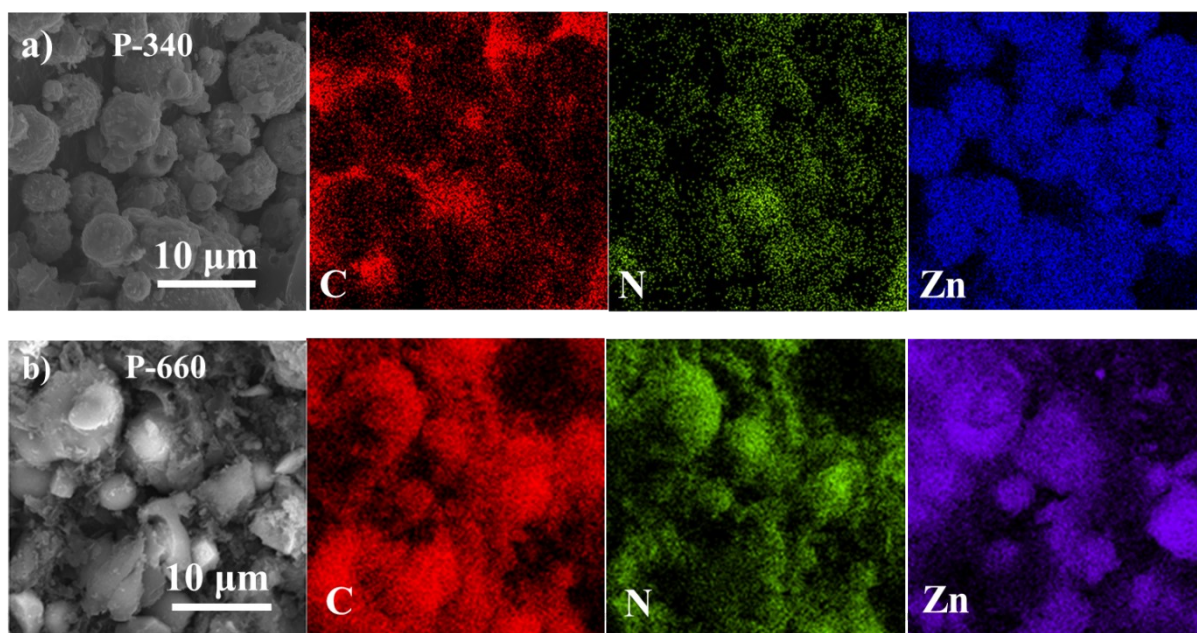

179

180

**Fig. S11.** EDX mappings of a) P-340 and b) P-660.

181

182

183

184

185

186

187

188

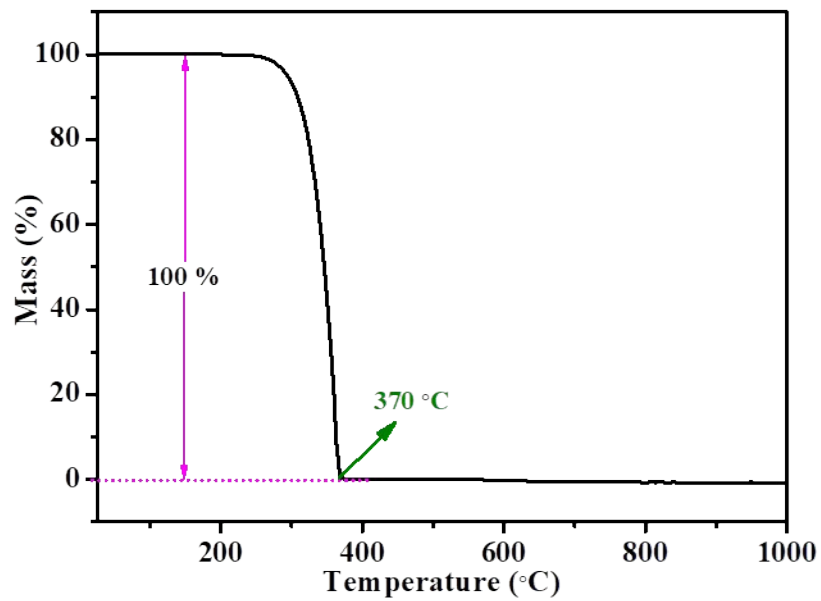

189

190

**Fig. S12.** TG curve during the pyrolysis of melamine.

191

192

193

194

195

196

197

198

199

200

201

202

203

204



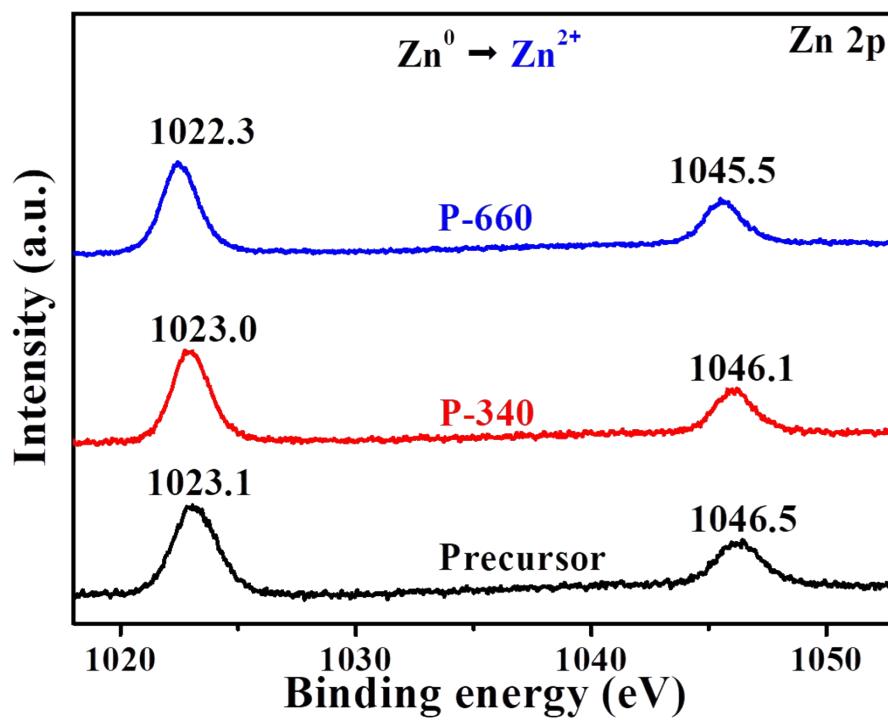

205

206

**Fig. S13.** High resolution Zn 2p XPS spectra of different P-T products.

207

208

209

210

211

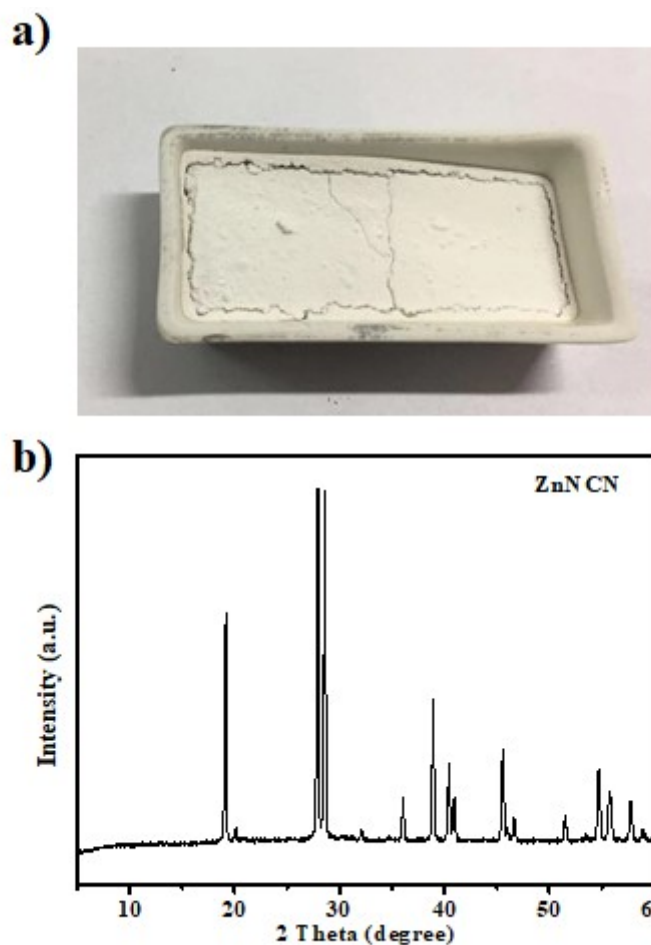

212

213 **Fig. S14.** a) Photo image and b) XRD pattern of the product obtained by annealing the  
214 mechanical mixture of ZnNCN and melamine with a mass ratio of 1:2 under 900 °C and ramp  
215 rate of 10 °C/min.

216

217

218

219

220

221

222

223

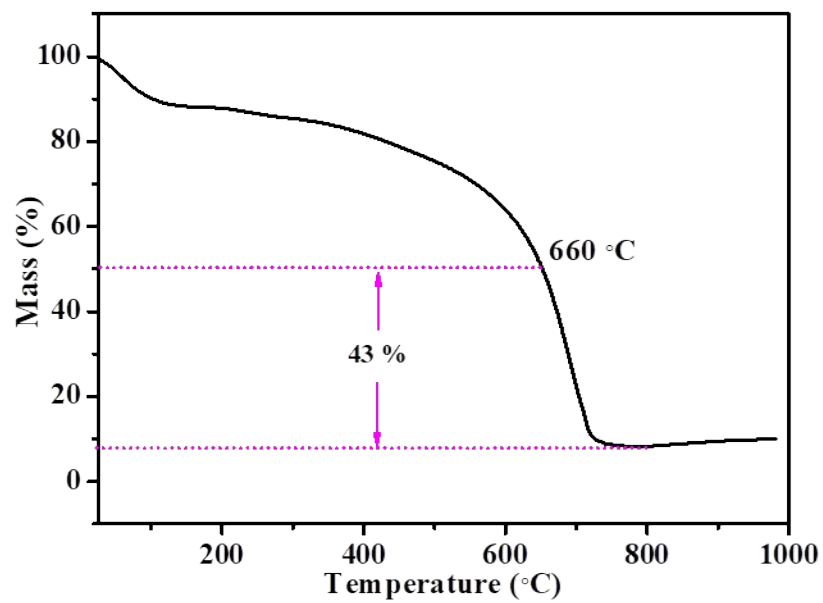

224

225

**Fig. S15.** TG curve during the pyrolysis of HCl-washed product of P-660.

226

227

228

229

230

231

232

233

234

235

236

237

238

239

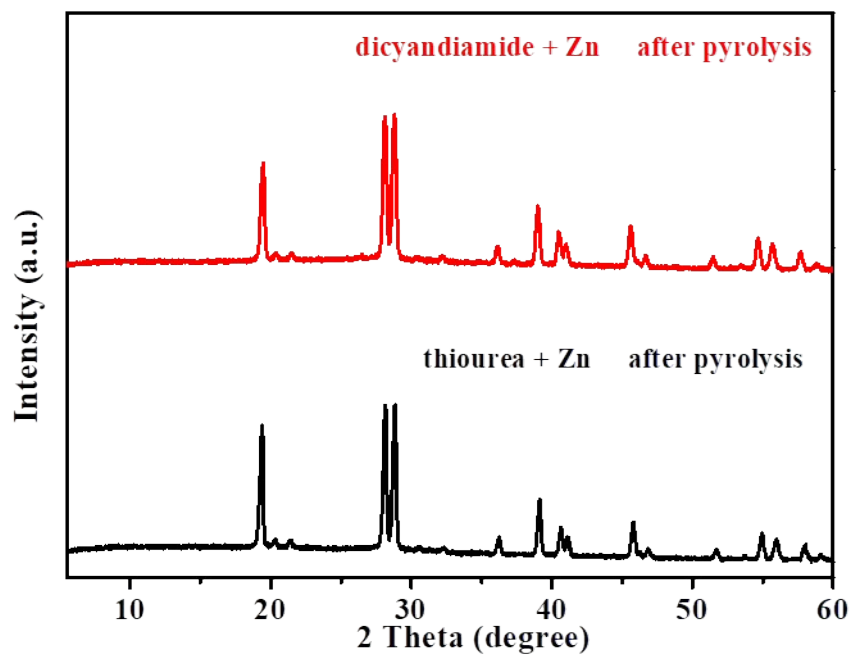

240

241 **Fig. S16.** XRD patterns of the pyrolytic products prepared by different organic precursors.

242

243

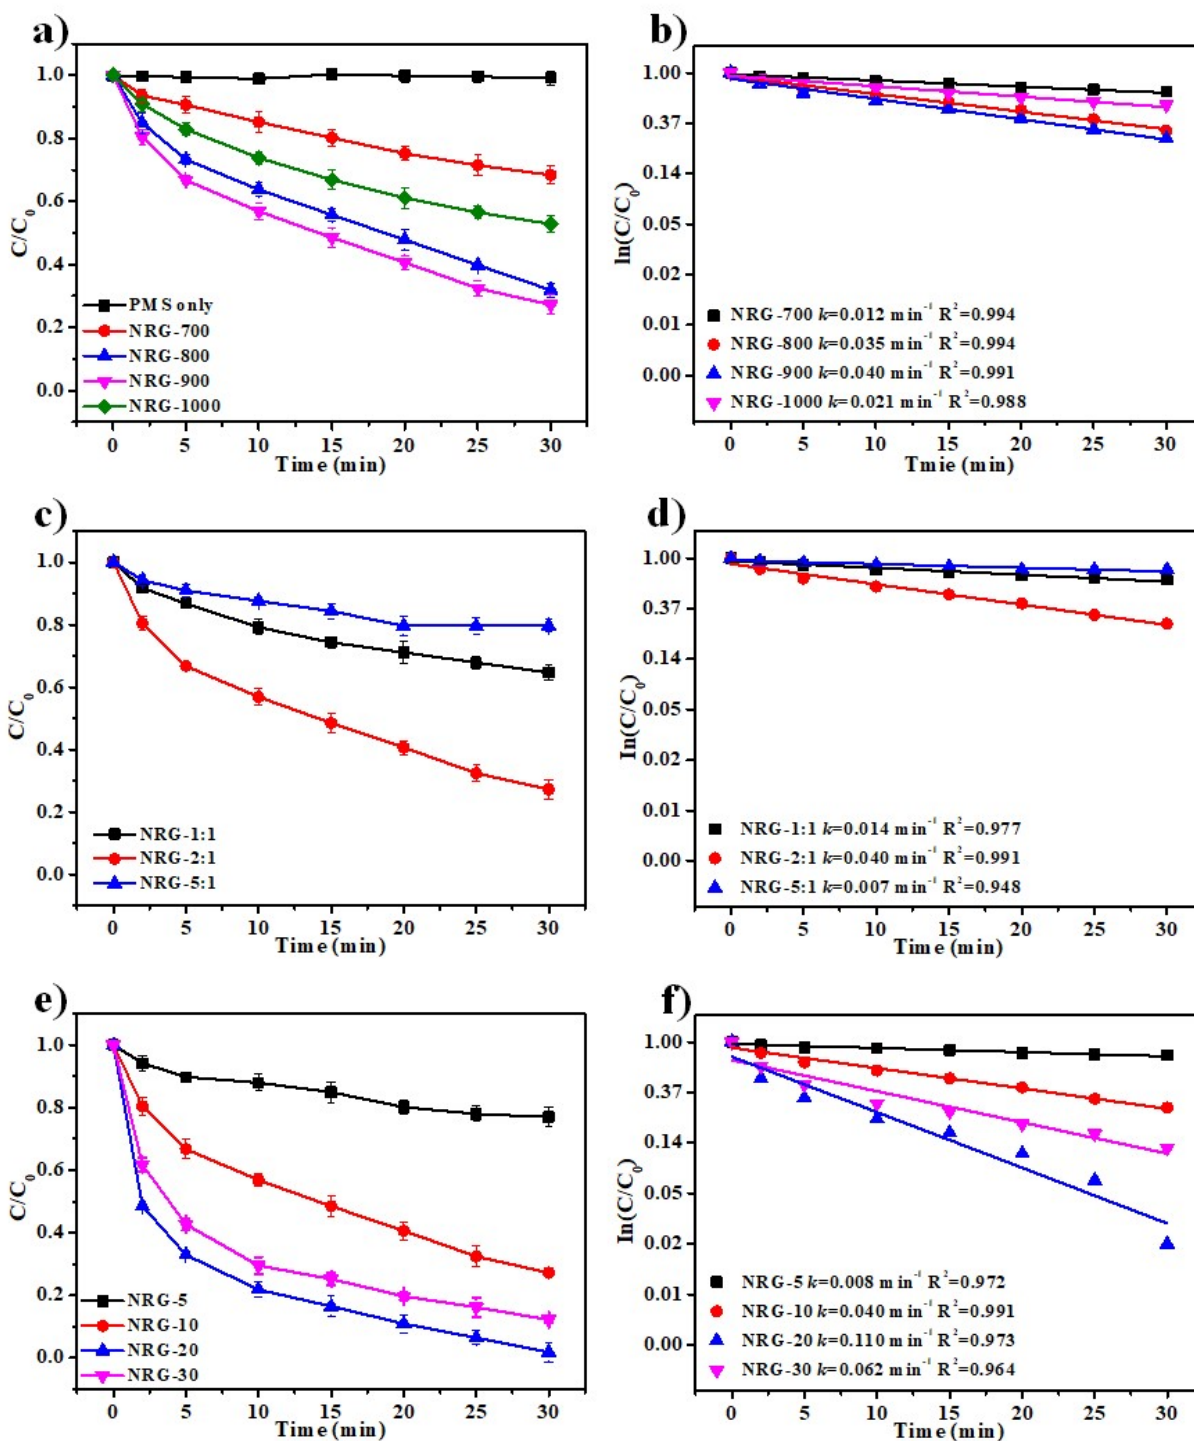

244

245 **Fig. S17.** Catalytic performance of tetracycline by different NRG samples and corresponding  
 246 first-order kinetic curves (Condition: [PMS] = 0.2 mM, [tetracycline] = 20 mg/L, [NRG] = 20  
 247 mg/L).

247

248

249

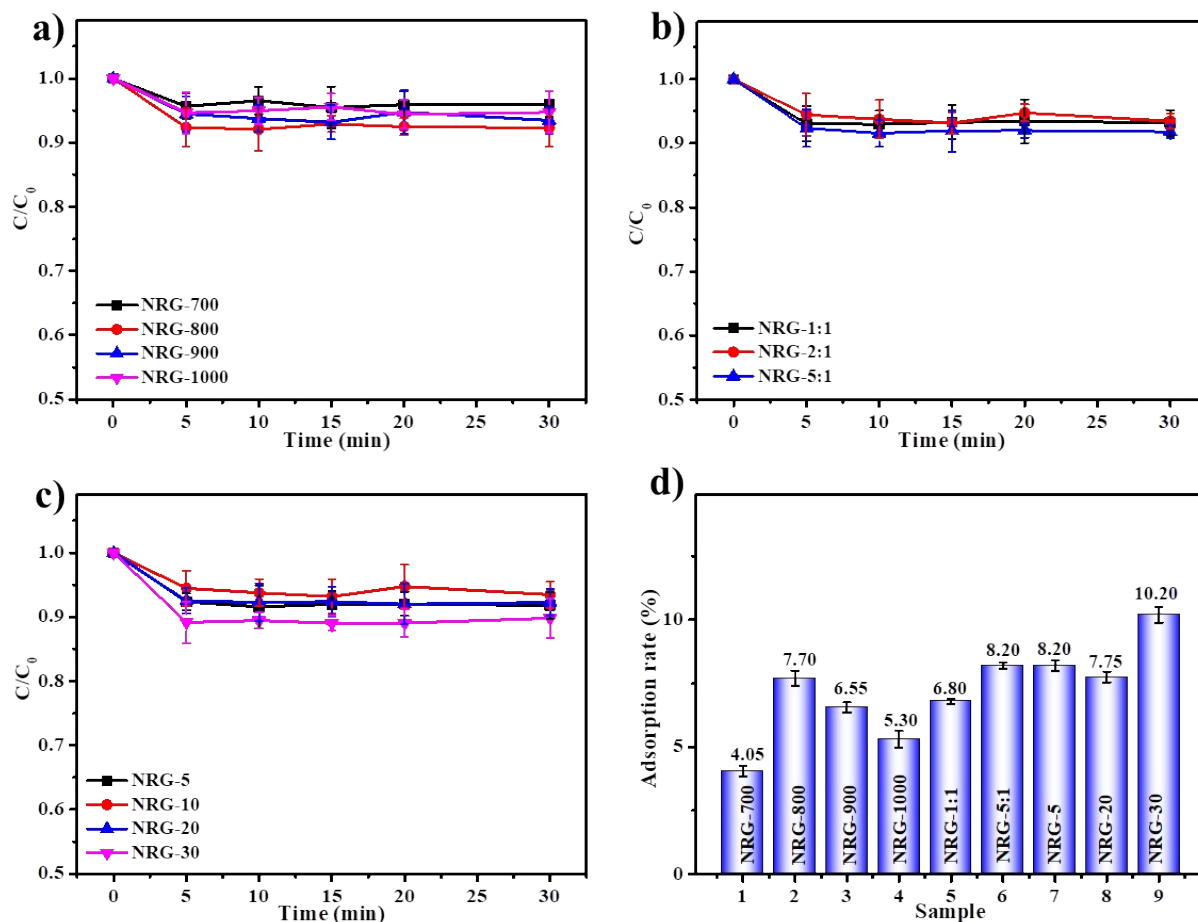

250

251 **Fig. S18.** Tetracycline adsorption rate of NRG samples (Condition: [tetracycline] = 20 mg/L,

252

[NRG] = 20 mg/L).

253

254

255

256

257

258

259

260

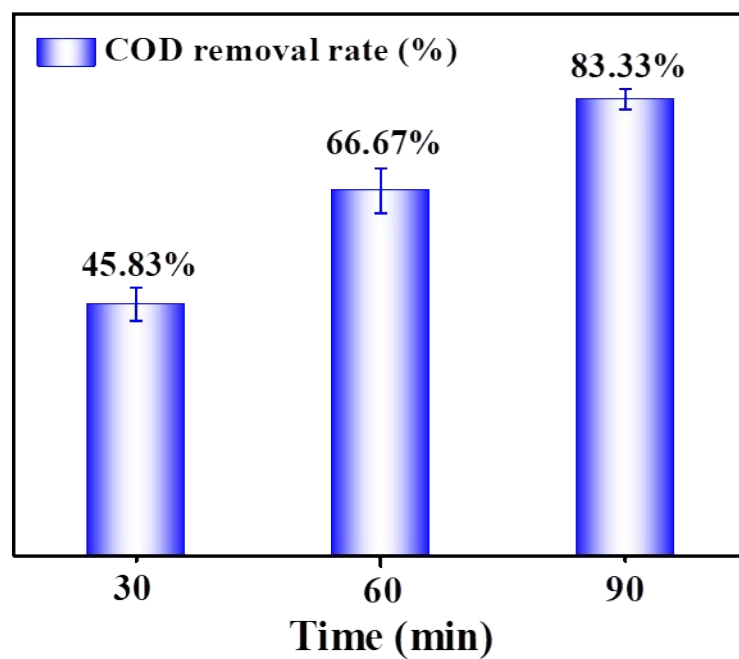

261

262

**Fig. S19.** COD removal rates of NRG-20/PMS system at different time.

263

264

265

266

267

268

269

270

271

272

273

274

275

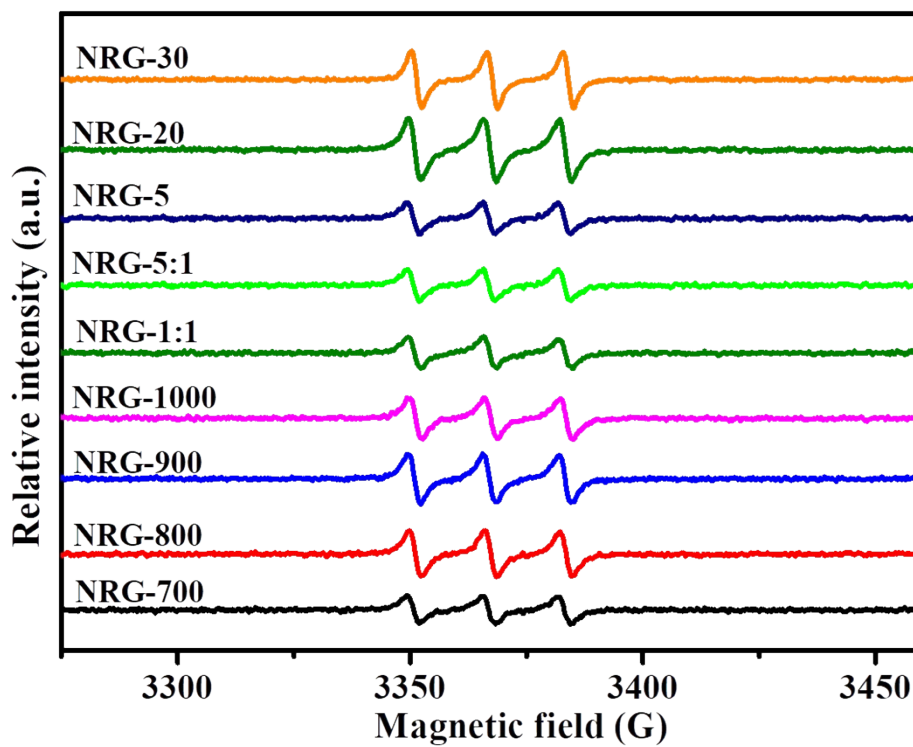

276

277

**Fig. S20.** EPR spectra of TEMP- $^1\text{O}_2$  in different NRG/PMS systems.

278

279

280

281

282

283

284

285

286

287

288



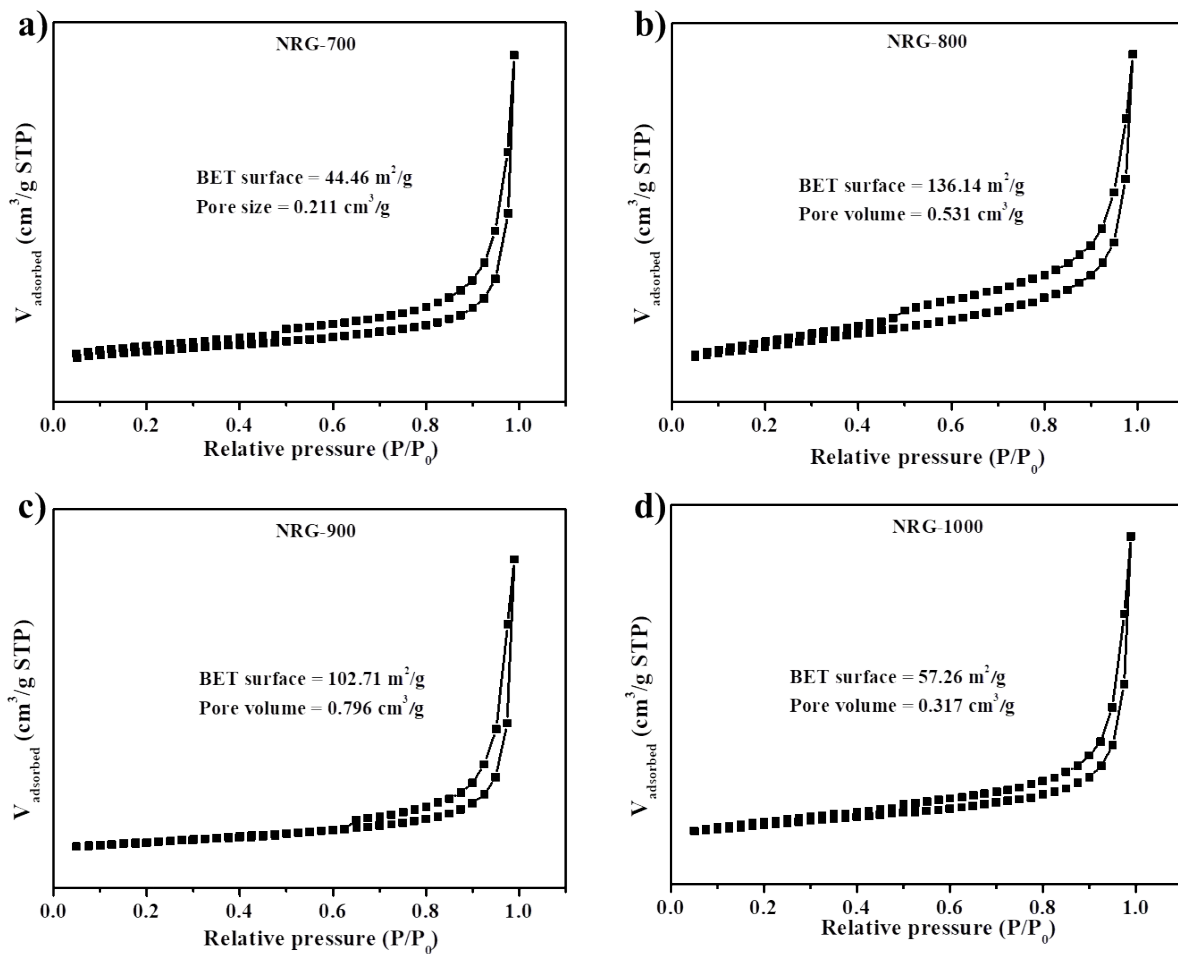

289

290 **Fig. S21.** N<sub>2</sub> adsorption-desorption isotherms of a) NRG-700, b) NRG-800, c) NRG-900 and

291

d) NRG-1000 samples.

292

293

294

295

296

297

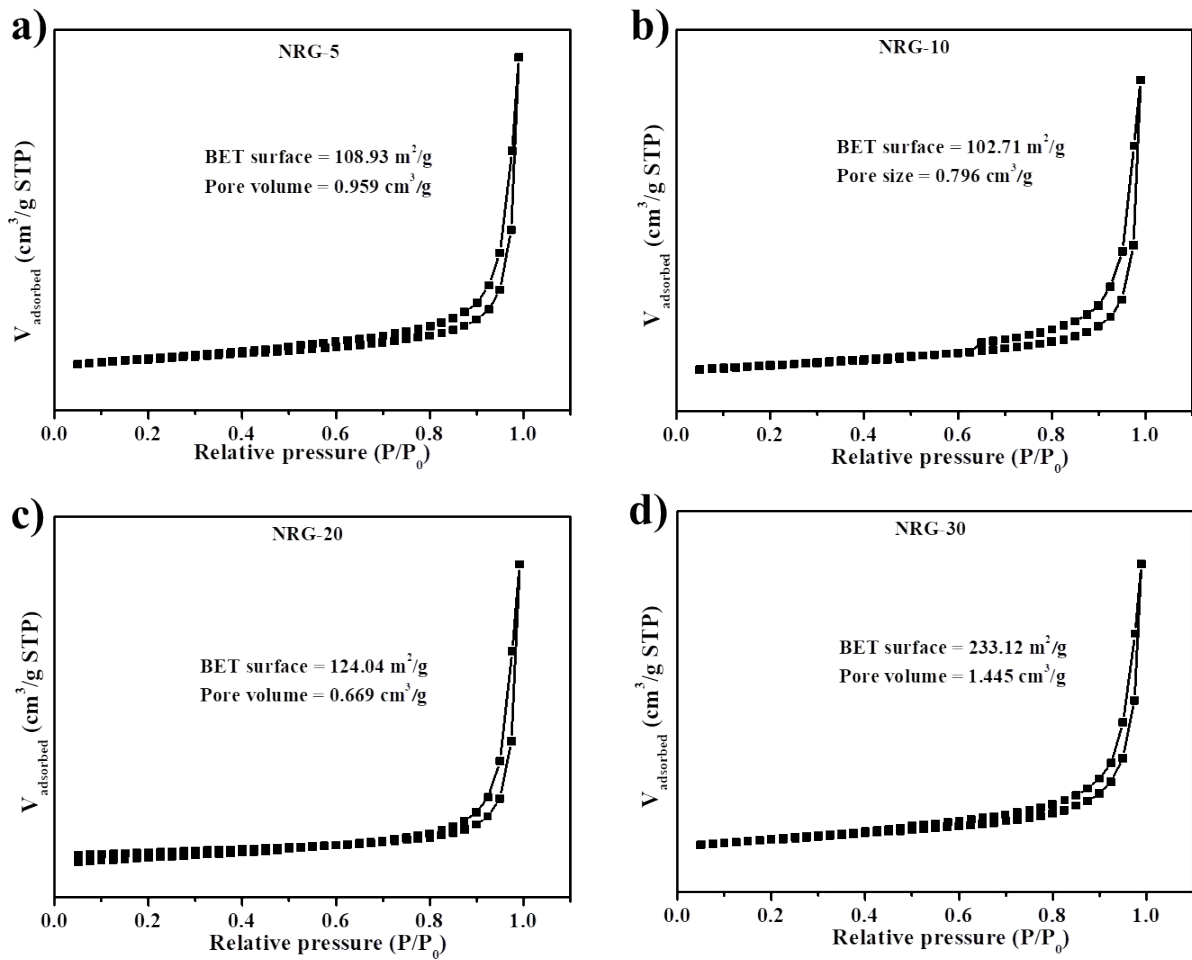

298

299 **Fig. S22.**  $N_2$  adsorption-desorption isotherms of a) NRG-5, b) NRG-10, c) NRG-20 and d)

300

NRG-30 samples.

301

302

303

304

305

306

307

308

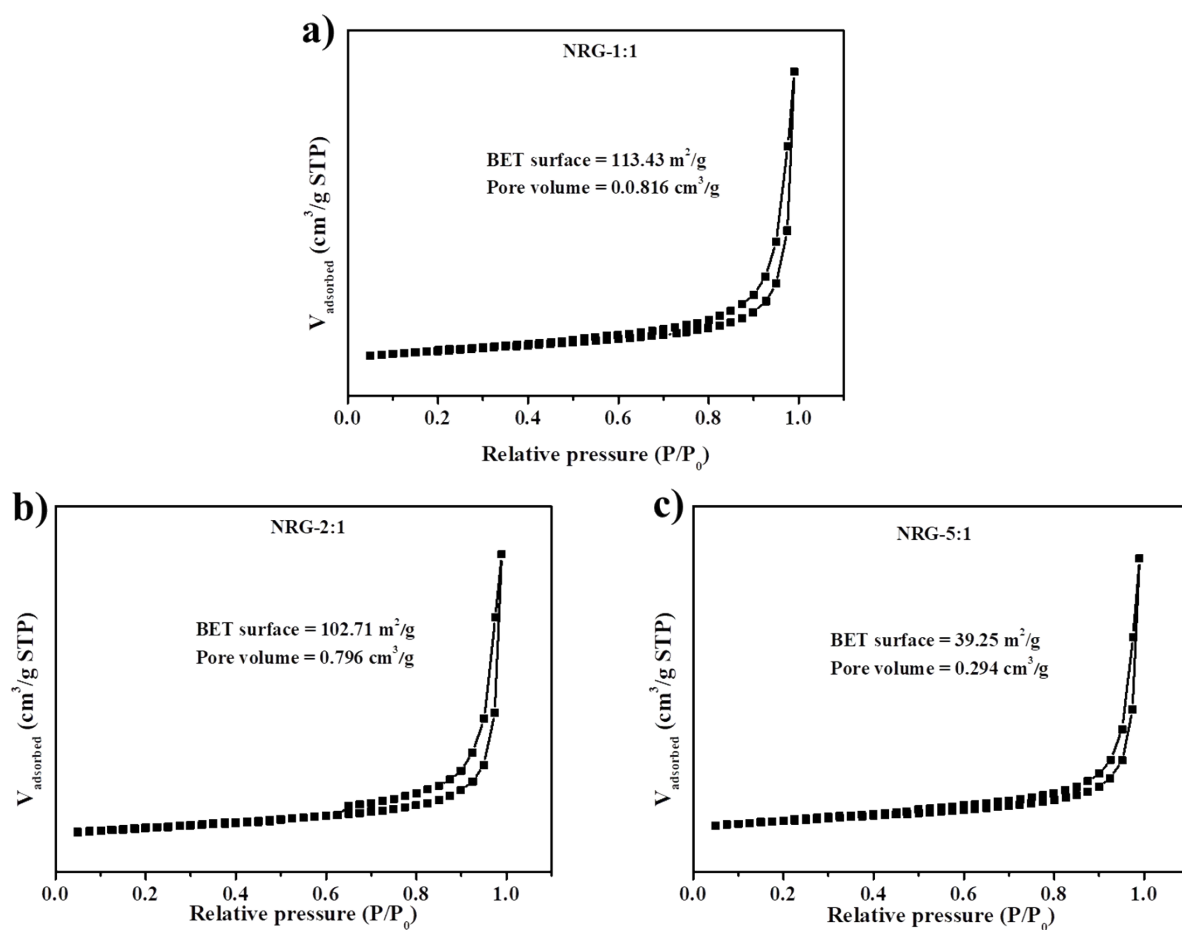

309

310 **Fig. S23.** N<sub>2</sub> adsorption-desorption isotherms of a) NRG-1:1, b) NRG-2:1 and c) NRG-5:1

311

samples.

312

313

314

315

316

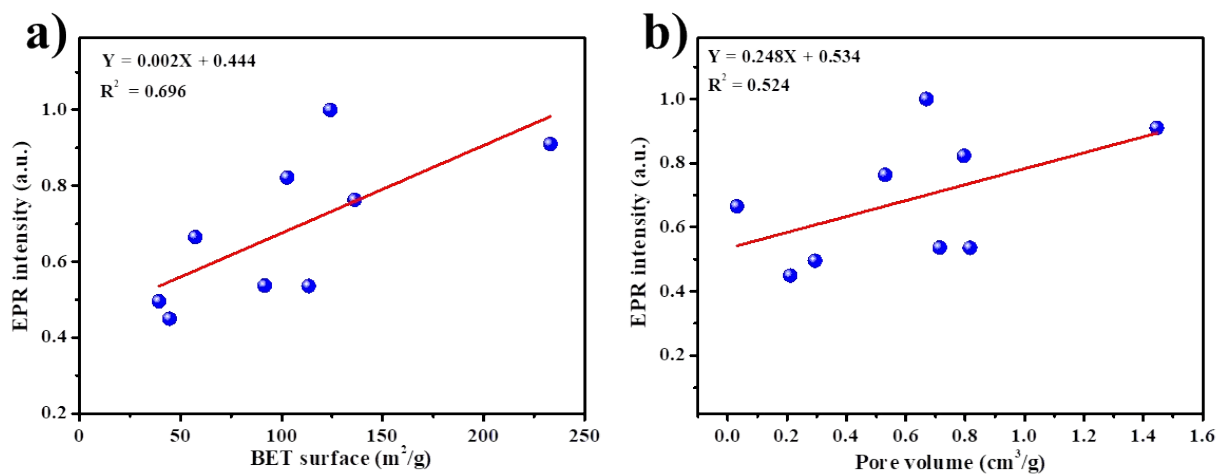

317

318 **Fig. S24.** a) BET surface and b) pore volume versus normalized TEMP-<sup>1</sup>O<sub>2</sub> EPR intensity.

319

320

321

322

323

324

325

326

327

328

329

330

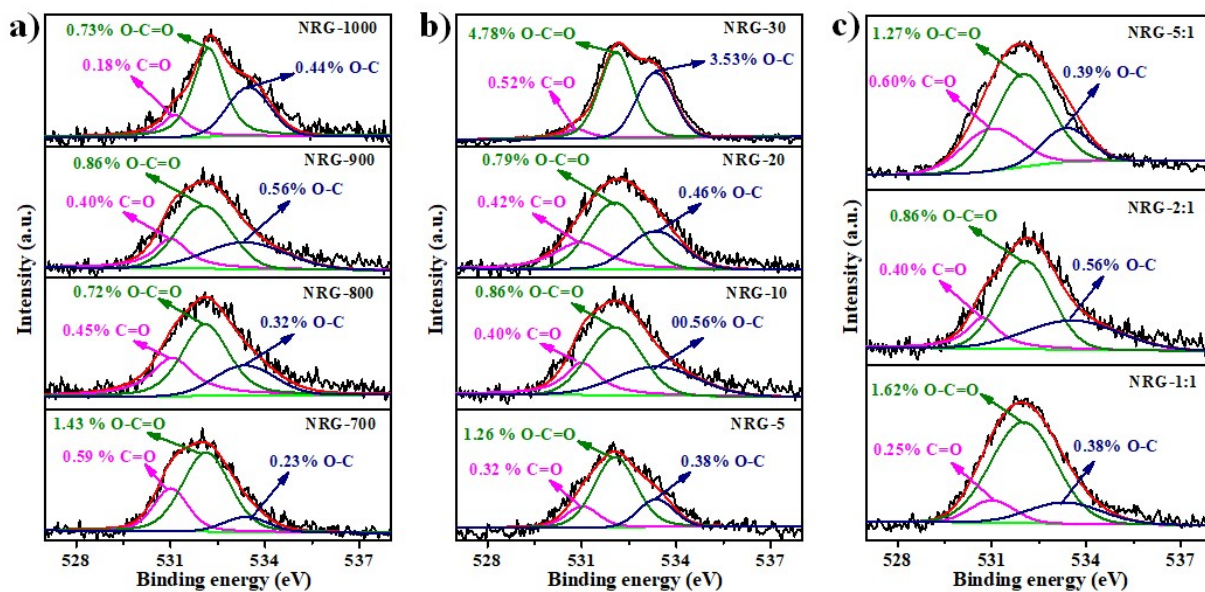

331

332 **Fig. S25.** High-resolution O 1s XPS spectra of NRG samples prepared at different conditions:

333

a) annealing temperature, b) ramp rate and c) melamine/Zn mass ratio.

334

335

336

337

338

339

340

341

342

343

344

345

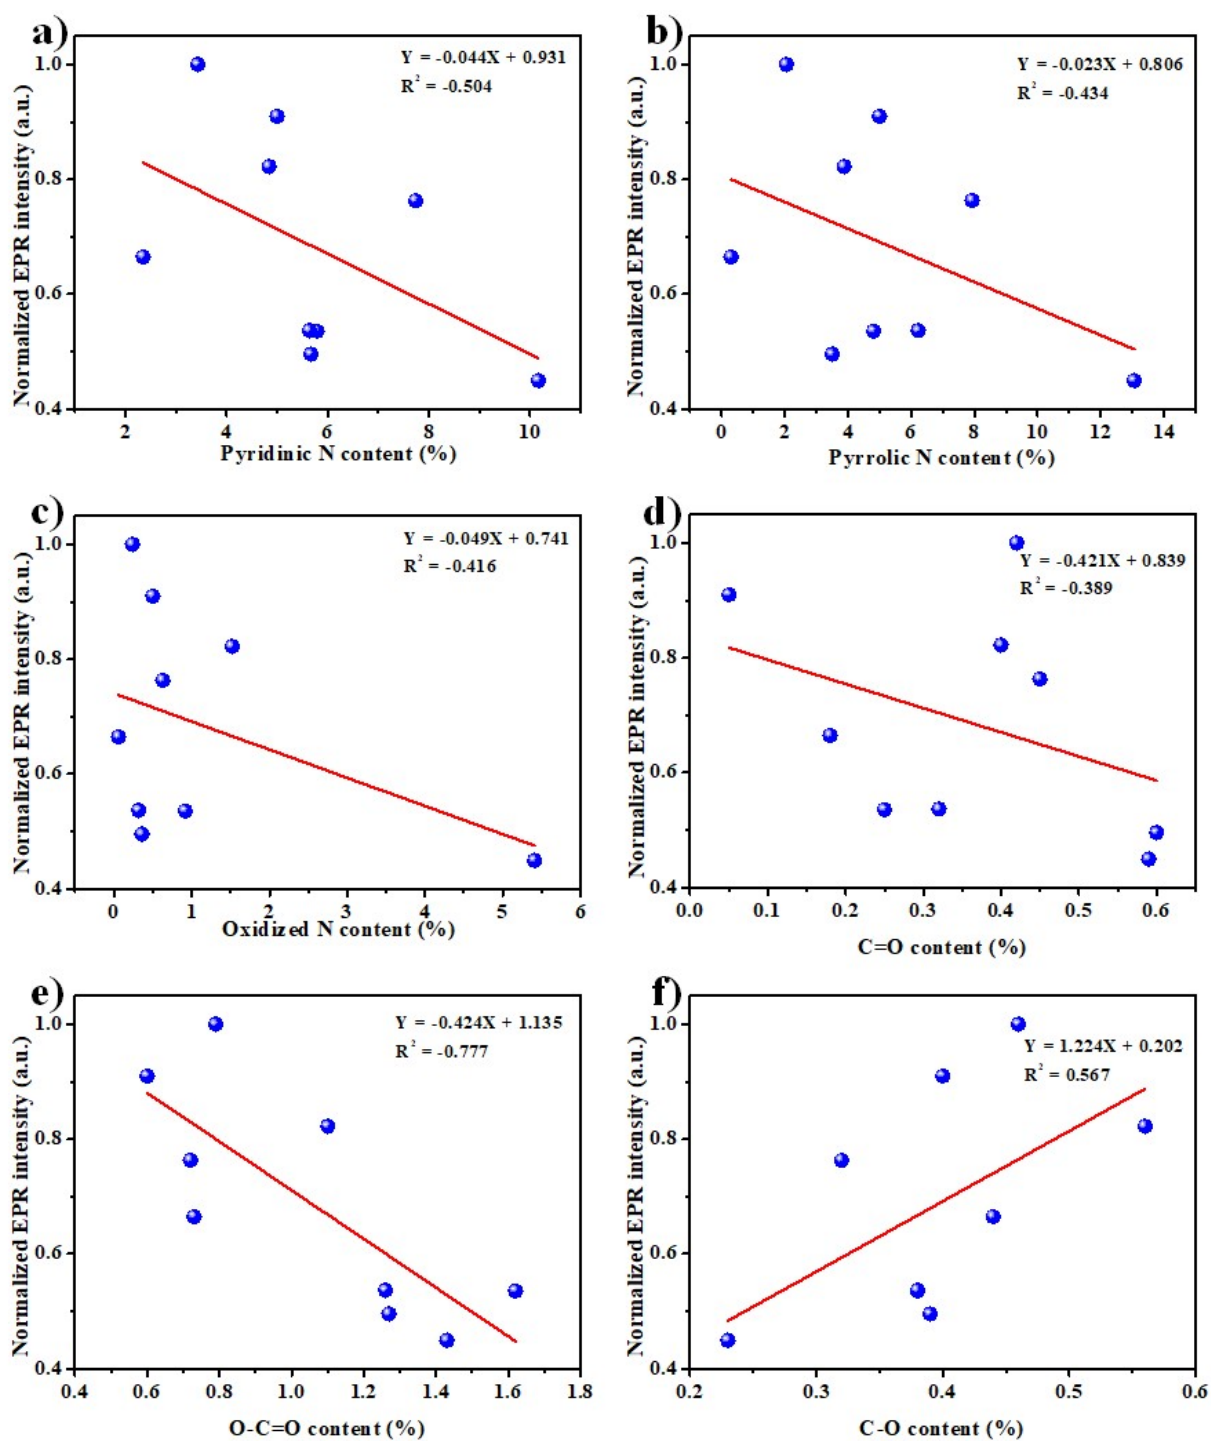

346

347 **Fig. S26.** a) pyridinic N, b) pyrrolic N, c) oxidized N, d) C=O, e) O-C=O and f) C-O amount

348

versus normalized TEMP-<sup>1</sup>O<sub>2</sub> EPR intensity.

349

350

351

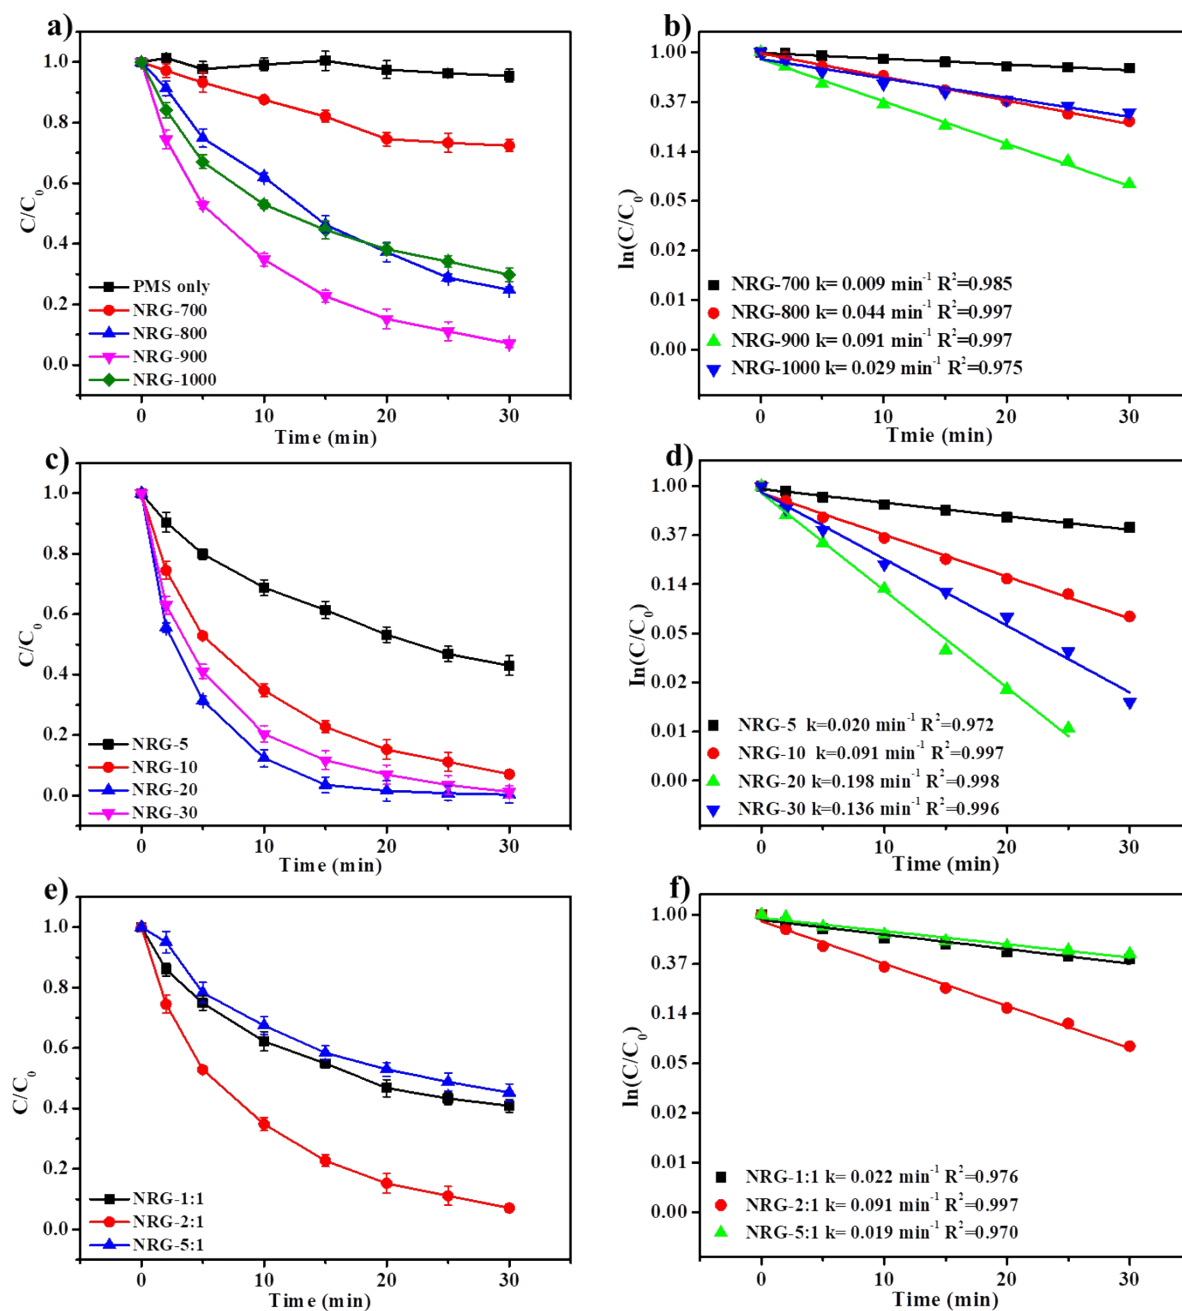

352

353 **Fig. S27.** a-f) Catalytic performance of RhB by different NRG samples and corresponding  
 354 first-order kinetic curves (Condition: [PMS] = 0.2 mM, [RhB] = 20 mg/L, [NRG] = 20 mg/L).

355

356

357

358

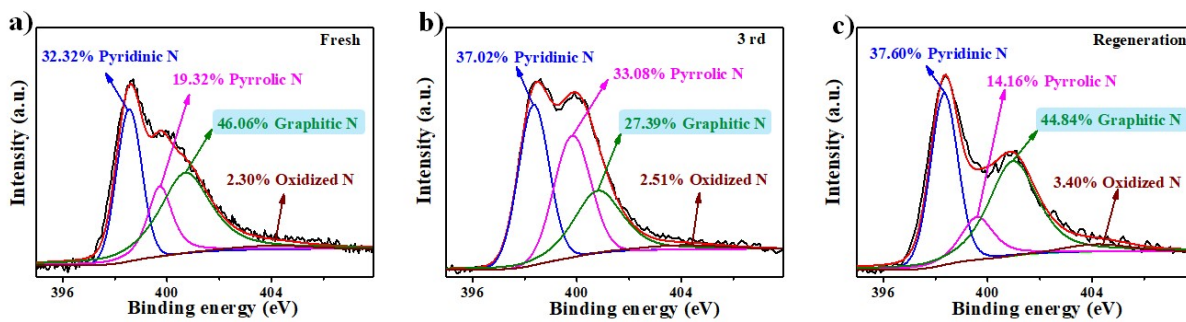

359

360 **Fig. S28.** High-resolution N 1s XPS spectra of a) fresh, b) used and c) regenerated NRG-20

361

samples.

362

363

364

365

366

367

368

369

370

371

372

373

374

375

376

377



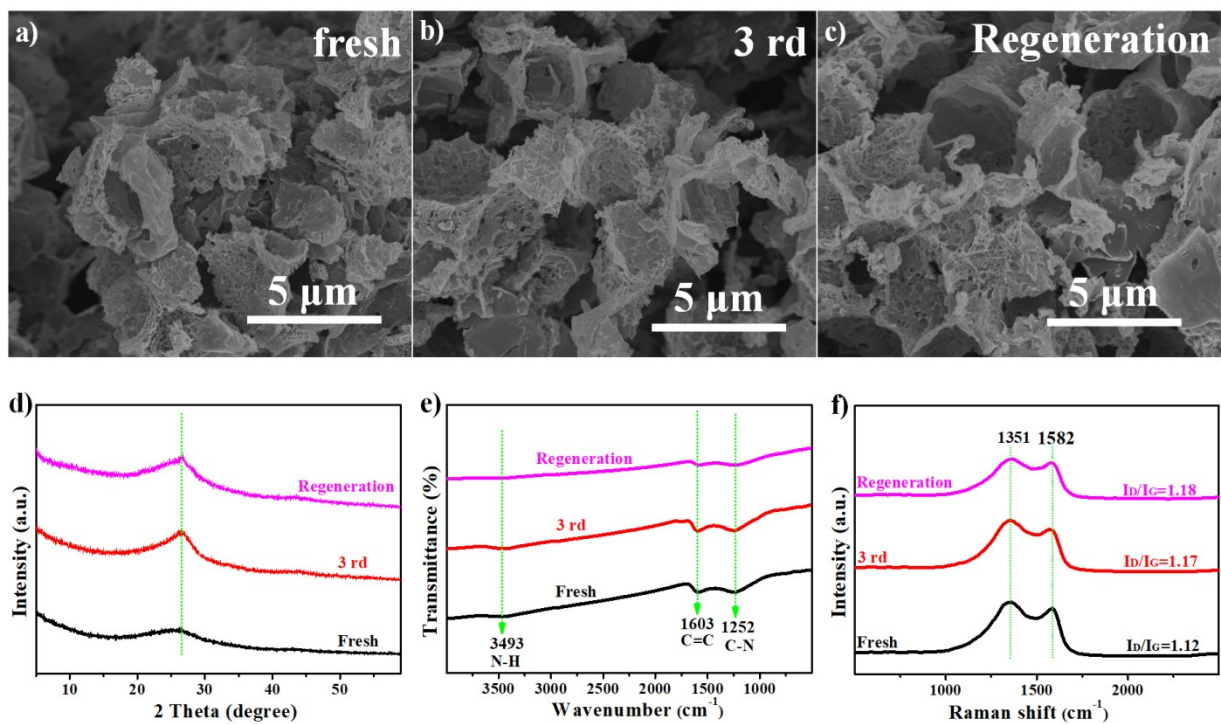

378

379 **Fig. S29.** a-c) SEM images, d) XRD patterns, e) FT-IR and f) Raman spectra of fresh, used

380

and regenerated NRG-20 samples.

381

382

383

384

385

386

387

388

389

390

391

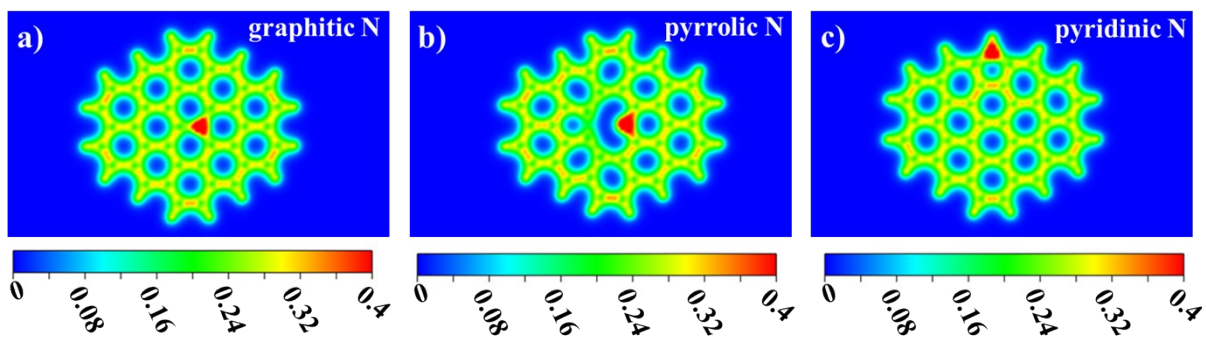

**Fig. S30.** a)-c) Valence-electron density maps of different N-doped graphene.

392

393

394

395

396

397

398

399

400

401

402

403

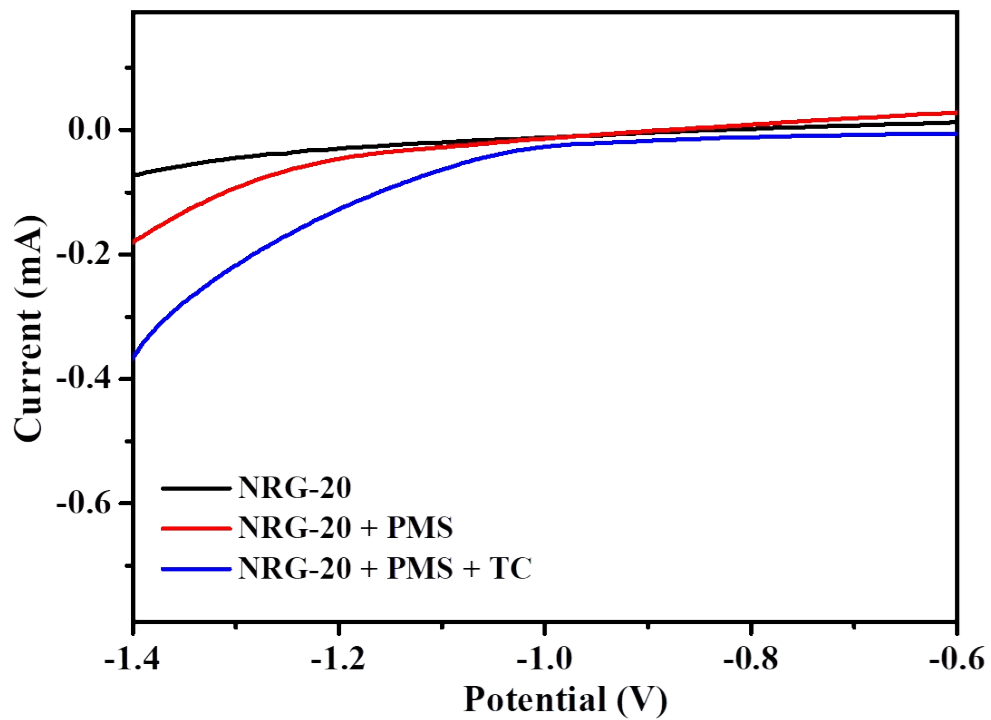

404

405

**Fig. S31.** LSV curves of NRG-20.

406

407

408

409

410

411

412

413

414

415

416

417

## 418 S3 Supporting Tables

419 **Table S1** Chemical properties of nitrogen-doped graphene prepared by different methods.

| Precursor                                              | Material    | Total N content<br>(at%) | Method           | Ref.      |
|--------------------------------------------------------|-------------|--------------------------|------------------|-----------|
| Ni/B/SiO <sub>2</sub> /Si                              | NG          | 0.95                     | CVD              | 6         |
| Ni <sub>30</sub> Mn <sub>70</sub> + pyridine           | NG          | 1.10                     | CVD              | 7         |
| Acetonitrile                                           | NG          | 1.40                     | CVD              | 8         |
| Ni + benzene + pyridine                                | NS500       | 2.90                     | CVD              | 9         |
| Ni + CH <sub>4</sub>                                   | NG          | 2.00                     | CVD              | 10        |
| Azafullerence                                          | NG          | 1.80                     | CVD              | 11        |
| Graphene                                               | NG          | 1.35                     | Plasma treatment | 12        |
| Graphene                                               | NG          | 1.00                     | Ion implantation | 13        |
| NH <sub>3</sub> + pyridine + H <sub>2</sub> + He       | NG          | 1.40                     | Arc discharge    | 14        |
| g-C <sub>3</sub> N <sub>4</sub>                        | NG          | 0.70                     | Ball milling     | 15        |
| GO + NH <sub>3</sub>                                   | NG          | 5.00                     | Prolysis         | 16        |
| Triethylene glycol + Ni <sub>30</sub> Mn <sub>70</sub> | N-MG-600    | 5.83                     | Prolysis         | 17        |
| GO + NH <sub>3</sub>                                   | N-GF        | 6.80                     | Prolysis         | 18        |
| GO + zinc gluconate + urea                             | N-C@G-900   | 4.20                     | Prolysis         | 19        |
| GO + cyanamide                                         | C-NGNSs-900 | 9.90                     | Prolysis         | 20        |
| g-C <sub>3</sub> N <sub>4</sub> + zinc                 | N-FLG-900   | 14.65                    | Prolysis         | 21        |
| Melamine                                               | NRG-ME      | 15.04                    | Prolysis         | This work |
| Dicyandiamide                                          | NRG-DI      | 13.63                    | Prolysis         | This work |
| Thiourea                                               | NRG-TI      | 14.33                    | Prolysis         | This work |

420

421

422

423

424

425

426

427

428 **Table S2** The catalytic performance comparison of recently reported catalysts for tetracycline  
 429 degradation. The turnover frequency (TOF) was calculated via dividing the reaction rate  
 430 constant of organics degradation by the catalyst concentration <sup>22,23</sup>.

| Catalyst amount<br>(g/L)                                          | tetracycline<br>concentration<br>(mg/L) | PMS/H <sub>2</sub> O <sub>2</sub><br>amount<br>(mM) | Remove<br>efficiency | TOF<br>(g <sup>-1</sup> •min <sup>-1</sup> ) | Ref.      |
|-------------------------------------------------------------------|-----------------------------------------|-----------------------------------------------------|----------------------|----------------------------------------------|-----------|
| FeSe <sub>2</sub> (0.1)                                           | 20                                      | PMS (0.1)                                           | 82% (120 min)        | /                                            | 24        |
| H-450CoMnO <sub>x</sub> @NC (0.1)                                 | 13                                      | PMS (0.3)                                           | 88.9% (30 min)       | 1.83                                         | 25        |
| CuFeO <sub>2</sub> /BC-1.0 (0.5)                                  | 20                                      | H <sub>2</sub> O <sub>2</sub> (50)                  | 88.4 % (300 min)     | 0.01                                         | 26        |
| PGBF-N (0.1)                                                      | 20                                      | PMS (1.0)                                           | 96.5% (150 min)      | 0.02                                         | 27        |
| C@FONC (0.5)                                                      | 150                                     | H <sub>2</sub> O <sub>2</sub> (5.0)                 | 97.0% (120 min)      | 0.01                                         | 28        |
| Fe/O-dopedg-C <sub>3</sub> N <sub>4</sub> (0.1)                   | 10                                      | PMS (1.0)                                           | 95% (6 min)          | /                                            | 29        |
| 5%Ca-Fe <sub>2</sub> O <sub>3</sub> (0.5)                         | 10                                      | PMS (3.3)                                           | 95% (120 min)        | /                                            | 30        |
| α-FeOOH-HA (1.0)                                                  | 20                                      | H <sub>2</sub> O <sub>2</sub> (1.0)                 | 98% (30 min)         | 0.12                                         | 31        |
| SOH-600 (0.15)                                                    | 50                                      | H <sub>2</sub> O <sub>2</sub> (1.6)                 | 80% (240 min)        | 0.03                                         | 32        |
| □Fe <sub>3</sub> (HITP) <sub>2</sub> (0.4)                        | 20                                      | H <sub>2</sub> O <sub>2</sub> (40.0)                | 96.7% (30 min)       | /                                            | 33        |
| □CNF-4 (0.5)                                                      | 21                                      | /                                                   | 64.2% (70 min)       | 0.03                                         | 34        |
| □AgI(5%)/CeO <sub>2</sub> (0.3)                                   | 40                                      | /                                                   | 88.1% (180 min)      | 0.03                                         | 35        |
| □□CTOC/BaTiO <sub>3</sub> /CuS (0.2)                              | 10                                      | /                                                   | 100% (60 min)        | 0.44                                         | 36        |
| □1.0 %CTQDs/BWO (0.05)                                            | 20                                      | /                                                   | 91.5% (135 min)      | 0.29                                         | 37        |
| □CALTCT-15 (1.0)                                                  | 10                                      | /                                                   | 96.7% (60 min)       | 0.05                                         | 38        |
| □Ag/Ag <sub>3</sub> PO <sub>4</sub> /BiVO <sub>4</sub> /RGO(0.05) | 10                                      | /                                                   | 95.0% (60 min)       | /                                            | 39        |
| □3D-PDI (0.5)                                                     | 20                                      | /                                                   | 80% (150 min)        | 0.02                                         | 40        |
| □ZIS@P20 (0.2)                                                    | 20                                      | /                                                   | 99.9% (60 min)       | 0.04                                         | 41        |
| □CuS <sub>4</sub> -ZIS (0.5)                                      | 20                                      | /                                                   | 90% (40 min)         | 0.12                                         | 42        |
| NRG-20 (0.02)                                                     | 20                                      | PMS (0.1)                                           | 98.2% (30 min)       | 5.50                                         | This work |

431 □represents that the reaction was carried out under light irradiation.

432

433

434

435

436 **Table S3** Amount of different N configurations in NRG samples.

| Sample   | $N_{py}/N_T$<br>(%) | $N_{py}/N_T$<br>(%) | $N_g/N_T$<br>(%) | $N_o/N_T$<br>(%) | $N_{py}$<br>(at%) | $N_{pr}$<br>(at%) | $N_g$<br>(at%) | $N_o$<br>(at%) |
|----------|---------------------|---------------------|------------------|------------------|-------------------|-------------------|----------------|----------------|
| NRG-ME   | 32.26               | 25.84               | 31.79            | 10.11            | 4.84              | 3.88              | 4.77           | 1.52           |
| NRG-DI   | 43.93               | 19.60               | 31.12            | 5.35             | 5.99              | 2.67              | 4.24           | 0.73           |
| NRG-TI   | 39.07               | 37.85               | 16.18            | 6.90             | 5.60              | 5.42              | 2.32           | 0.99           |
| NRG-700  | 33.59               | 43.12               | 5.42             | 17.88            | 10.17             | 13.06             | 1.64           | 5.41           |
| NRG-800  | 38.75               | 39.68               | 18.43            | 3.14             | 7.74              | 7.93              | 3.68           | 0.63           |
| NRG-900  | 32.26               | 25.84               | 31.79            | 10.11            | 4.84              | 3.88              | 4.77           | 1.52           |
| NRG-1000 | 44.34               | 5.70                | 48.79            | 1.17             | 2.35              | 0.30              | 2.59           | 0.06           |
| NRG-1:1  | 40.02               | 33.28               | 20.36            | 6.34             | 5.79              | 4.81              | 2.94           | 0.92           |
| NRG-2:1  | 32.26               | 25.84               | 31.79            | 10.11            | 4.84              | 3.88              | 4.77           | 1.52           |
| NRG-5:1  | 47.58               | 29.35               | 20.04            | 3.03             | 5.67              | 3.50              | 2.39           | 0.36           |
| NRG-5    | 37.51               | 41.38               | 18.95            | 2.16             | 5.64              | 6.22              | 2.85           | 0.32           |
| NRG-10   | 32.26               | 25.84               | 31.79            | 10.11            | 4.84              | 3.88              | 4.77           | 1.52           |
| NRG-20   | 32.32               | 19.32               | 46.06            | 2.30             | 3.43              | 2.05              | 4.89           | 0.24           |
| NRG-30   | 41.78               | 13.01               | 44.95            | 0.27             | 4.48              | 1.40              | 4.82           | 0.03           |

437 \*  $N_{py}$ ,  $N_{pr}$ ,  $N_g$ ,  $N_o$ , and  $N_T$  represents pyridinic, pyrrolic, graphitic, oxidized and total N amount,  
 438 respectively.

439

440

441

442

443

444

445

446 **Table S4** Organic contents in P-T samples.

| Sample | Weight of precursor (g) | Weight of precursor after pyrolysis (g) | Weight of precursor after pyrolysis and acid washing (g) | Organic proportion In P-T (%) |
|--------|-------------------------|-----------------------------------------|----------------------------------------------------------|-------------------------------|
| P-340  | 10.0                    | 4.8                                     | 1.1                                                      | 23                            |
| P-660  | 10.0                    | 4.2                                     | 1.0                                                      | 24                            |

447

448

449

450

451

452

453

454

455

456

457

458

459

460

461

462

463

## 464 References

- 465 1. Y. Xie, Y. Zhuo, S. Liu, Y. Lin, D. Zuo, X. Wu, C. Li and P. K. Wong, *Sol. RRL*, 2020, **4**,  
466 1900440.
- 467 2. A. Wang, Z. Zheng, H. Wang, Y. Chen, C. Luo, D. Liang, B. Hu, R. Qiu and K. Yan,  
468 *Appl. Catal. B: Environ.*, 2020, **277**, 119171.
- 469 3. G. Kresse and J. Hafner, *Phys. Rev. B.* , 1994, **49**, 14251-14269.
- 470 4. S. Grimme, J. Antony, S. Ehrlich and H. Krieg, *J. Chem. Phys.*, 2010, **132**, 154104.
- 471 5. G. Kresse and D. Joubert, *Phy. Rev. B* 1999, **59**, 1758-1775.
- 472 6. C. Zhang, L. Fu, N. Liu, M. Liu, Y. Wang and Z. Liu, *Adv. Mater.*, 2011, **23**, 1020-1024.
- 473 7. G. Huang, J. Han, F. Zhang, Z. Wang, H. Kashani, K. Watanabe and M. Chen, *Adv.*  
474 *Mater.*, 2019, **31**, 1805334.
- 475 8. L. Lin, J. Li, Q. Yuan, Q. Li, J. Zhang, L. Sun, D. Rui, Z. Chen, K. Jia, M. Wang, Y.  
476 Zhang, M. Rummeli, N. Kang, H. Q. Xu, F.mDing, H. Peng and Z. Liu, *Sci. Adv.*, 2021,  
477 **5**, 8337.
- 478 9. L. Chen, J. Han, Y. Ito, T. Fujita, G. Huang, K. Hu, A. Hirata, K. Watanabe and M.  
479 Chen, *Angew. Chem. Int. Ed.*, 2018, **57**, 13302-13307.
- 480 10. Z. Sun, Z. Yan, J. Yao, E. Beitler, Y. Zhu and J. M. Tour, *Nature*, 2010, **468**, 549-552.
- 481 11. X. Fei, J. Neilson, Y. Li, V. Lopez, S. J. Garrett, L. Gan, H. J. Gao and L. Gao, *Nano*  
482 *Lett.*, 2017, **17**, 2887-2894.
- 483 12. Y. Wang, Y. Shao, D. W. Matson, J. Li and Y. Lin, *Acs. Nano*, 2010, **4**, 1790-1798.
- 484 13. U. Bangert, W. Pierce, D. M. Kepaptsoglou, Q. Ramasse, R. Zan, M. H. Gass, J. A.  
485 Van den Berg, C. B. Boothroyd, J. Amani and H. Hofsass, *Nano Lett*, 2013, **13**, 4902-



- 486 4907.
- 487 14. L. S. Panchakarla, K. S. Subrahmanyam, S. K. Saha, A. Govindaraj, H. R.  
488 Krishnamurthy, U. V. Waghmare and C. N. R. Rao, *Adv. Mater.*, 2009, **21**, 4726-4730.
- 489 15. Y. Yuan, T. Wang, H. Chen, S. M. Mahurin, H. Luo, G. M. Veith, Z. Yang and S. Dai,  
490 *Angew. Chem. Int. Ed.*, 2020, **59**, 21935-21939.
- 491 16. X. Li, H. Wang, J. T. Robinson, H. Sanchez, G. Diankov and H. Dai, *J. Am. Chem. Soc.*,  
492 2009, **131**, 15939-15944.
- 493 17. J. Han, G. Huang, Z. Wang, Z. Lu, J. Du, H. Kashani and M. Chen, *Adv. Mater.*, 2018,  
494 **30**, 1803588.
- 495 18. J. Xu, M. Wang, N. P. Wickramaratne, M. Jaroniec, S. Dou and L. Dai, *Adv. Mater.*,  
496 2015, **27**, 2042-2048.
- 497 19. J. Sun, S. E. Lowe, L. Zhang, Y. Wang, K. Pang, Y. Wang, Y. Zhong, P. Liu, K. Zhao,  
498 Z. Tang and H. Zhao, *Angew. Chem. Int. Ed.*, 2018, **57**, 16511-16515.
- 499 20. Z. Wen, X. Wang, S. Mao, Z. Bo, H. Kim, S. Cui, G. Lu, X. Feng and J. Chen, *Adv.*  
500 *Mater.*, 2012, **24**, 5610-5616.
- 501 21. J. Liu, Y. Zhang, L. Zhang, F. Xie, A. Vasileff and S. Z. Qiao, *Adv. Mater.*, 2019, **31**,  
502 1901261.
- 503 22. X. Li, Z. Ao, J. Liu, H. Sun, A. I. Rykov and J. Wang, *ACS. Nano*, 2016, **10**, 11532-  
504 11540.
- 505 23. X. Li, X. Huang, S. Xi, S. Miao, J. Ding, W. Cai, S. Liu, X. Yang, H. Yang, J. Gao, J.  
506 Wang, Y. Huang, T. Zhang and B. Liu, *J. Am. Chem. Soc.*, 2018, **140**, 12469-12475.
- 507 24. G. Fang, T. Zhang, H. Cui, D. D. Dionysiou, C. Liu, J. Gao, Y. Wang and D. Zhou,

- 508 *Environ. Sci. Technol.*, 2020, **54**, 15489-15498.
- 509 25. A. Wang, Y. Chen, Z. Zheng, H. Wang, X. Li, Z. Yang, R. Qiu and K. Yan, *Chem. Eng.*  
510 *J.*, 2021, **411**, 128497.
- 511 26. S. Xin, G. Liu, X. Ma, J. Gong, B. Ma, Q. Yan, Q. Chen, D. Ma, G. Zhang, M. Gao and  
512 Y. Xin, *Appl. Catal. B: Environ.*, 2021, **280**, 119386.
- 513 27. S. Ye, G. Zeng, X. Tan, H. Wu, J. Liang, B. Song, N. Tang, P. Zhang, Y. Yang, Q. Chen  
514 and X. Li, *Appl. Catal. B: Environ.*, 2020, **269**, 118850.
- 515 28. J. Zhou, F. Ma, H. Guo and D. Su, *Appl. Catal. B: Environ.*, 2020, **269**, 118784.
- 516 29. F. Chen, L. L. Liu, J. J. Chen, W. W. Li, Y. P. Chen, Y. J. Zhang, J. H. Wu, S. C. Mei,  
517 Q. Yang and H. Q. Yu, *Water Res.*, 2021, **191**, 116799.
- 518 30. S. Guo, H. Wang, W. Yang, H. Fida, L. You and K. Zhou, *Appl. Catal. B: Environ.*,  
519 2020, **262**, 118250.
- 520 31. X. Hou, X. Huang, F. Jia, Z. Ai, J. Zhao and L. Zhang, *Environ. Sci. Technol.*, 2017, **51**,  
521 5118-5126.
- 522 32. H. Wang, T. Chen, D. Chen, X. Zou, M. Li, F. Huang, F. Sun, C. Wang, D. Shu and H.  
523 Liu, *Appl. Catal. B: Environ.*, 2020, **260**, 118203.
- 524 33. D. Xing, Z. Cui, Y. Liu, Z. Wang, P. Wang, Z. Zheng, H. Cheng, Y. Dai and B. Huang,  
525 *Appl. Catal. B: Environ.*, 2021, **290**, 120029.
- 526 34. H. Wang, Y. Wu, M. Feng, W. Tu, T. Xiao, T. Xiong, H. M. Ang, X. Yuan and J. Chew,  
527 *Water Res.*, 2018, **144**, 215-225.
- 528 35. M. Li, P. Wang, Z. Ji, Z. Zhou, Y. Xia, Y. Li and S. Zhan, *Appl. Catal. B: Environ.*,  
529 2021, **289**, 120020.

- 530 36. L. Zhou, S. Dai, S. Xu, Y. She, Y. Li, S. Leveneur and Y. Qin, *Appl. Catal. B: Environ.*,  
531 2021, **291**, 120019.
- 532 37. P. Yang, C. Chen, D. Wang, H. Ma, Y. Du, D. Cai, X. Zhang and Z. Wu, *Appl. Catal. B:  
533 Environ.*, 2021, **285**, 119877.
- 534 38. B. Shao, Z. Liu, G. Zeng, Y. Liu, Q. Liang, Q. He, T. Wu, Y. Pan, J. Huang, Z. Peng, S.  
535 Luo, C. Liang, X. Liu, S. Tong and J. Liang, *Appl. Catal. B: Environ.*, 2021, **286**,  
536 119867.
- 537 39. F. Chen, Q. Yang, X. Li, G. Zeng, D. Wang, C. Niu, J. Zhao, H. An, T. Xie and Y. Deng,  
538 *Appl. Catal. B: Environ.*, 2017, **200**, 330-342.
- 539 40. Q. Zhang, L. Jiang, J. Wang, Y. Zhu, Y. Pu and W. Dai, *Appl. Catal. B: Environ.*, 2020,  
540 **277**, 119122.
- 541 41. P. Jin, L. Wang, X. Ma, R. Lian, J. Huang, H. She, M. Zhang and Q. Wang, *Appl. Catal.  
542 B: Environ.*, 2021, **284**, 119762.
- 543 42. H. Li, S. Sun, H. Ji, W. Liu and Z. Shen, *Appl. Catal. B: Environ.*, 2020, **272**, 118966.  
544
